1 TGF $\beta$  signalling is required to maintain pluripotency of human naïve pluripotent stem cells

2

3

4

5 Anna Osnato<sup>1,2</sup>, Stephanie Brown<sup>1,2</sup>, Christel Krueger<sup>3</sup>, Simon Andrews<sup>3</sup>, Amanda J. Collier<sup>4</sup>,  
6 Shota Nakanoh<sup>1,2,5</sup>, Mariana Quiroga Londoño<sup>1,2</sup>, Brandon T. Wesley<sup>1,2</sup>, Daniele Muraro<sup>1,2,6</sup>,  
7 Sophie Brumm<sup>7</sup>, Kathy Niakan<sup>7,8</sup>, Ludovic Vallier<sup>1,2,9</sup>, Daniel Ortmann<sup>1,2,9</sup>, Peter J. Rugg-  
8 Gunn<sup>1,4,8,9</sup>

9

10

11 <sup>1</sup>Wellcome–MRC Cambridge Stem Cell Institute, Jeffrey Cheah Biomedical Centre,  
12 University of Cambridge, Cambridge, CB2 0AW, UK

13 <sup>2</sup>Department of Surgery, University of Cambridge, Cambridge, CB2 0SZ, UK

14 <sup>3</sup>Bioinformatics Group, The Babraham Institute, Cambridge, CB22 3AT, UK

15 <sup>4</sup>Epigenetics Programme, The Babraham Institute, Cambridge, CB22 3AT, UK

16 <sup>5</sup>Division of Embryology, National Institute for Basic Biology, Okazaki 444-8787, Japan

17 <sup>6</sup>Wellcome Sanger Institute, Hinxton, Cambridge, CB10 1SA, UK

18 <sup>7</sup>Human Embryo and Stem Cell Laboratory, The Francis Crick Institute, London, NW1 1AT,  
19 UK

20 <sup>8</sup>Centre for Trophoblast Research, University of Cambridge, Cambridge, CB2 3EG, UK

21 <sup>9</sup>These authors jointly supervised this work

1 **Abstract**

2 The signalling pathways that maintain primed human pluripotent stem cells (hPSCs) have been  
3 well characterised, revealing a critical role for TGF $\beta$ /Activin/Nodal signalling. In contrast, the  
4 signalling requirements of naïve human pluripotency have not been fully established. Here, we  
5 demonstrate that TGF $\beta$  signalling is required to maintain naïve hPSCs. The downstream  
6 effector proteins – SMAD2/3 – bind common sites in naïve and primed hPSCs, including  
7 shared pluripotency genes. In naïve hPSCs, SMAD2/3 additionally bind to active regulatory  
8 regions near to naïve pluripotency genes. Inhibiting TGF $\beta$  signalling in naïve hPSCs causes  
9 the downregulation of SMAD2/3-target genes and pluripotency exit. Single-cell analyses  
10 reveal that naïve and primed hPSCs follow different transcriptional trajectories after inhibition  
11 of TGF $\beta$  signalling. Primed hPSCs differentiate into neuroectoderm cells, whereas naïve  
12 hPSCs transition into trophectoderm. These results establish that there is a continuum for TGF $\beta$   
13 pathway function in human pluripotency spanning a developmental window from naïve to  
14 primed states.

## 1 Introduction

2 Human pluripotent stem cells (hPSCs) are grown *in vitro* as two broadly different states termed  
3 naïve and primed (Davidson et al., 2015; Weinberger et al., 2016). The two states diverge in  
4 their embryonic identity with primed hPSCs recapitulating post-implantation epiblast, and  
5 naïve hPSCs resembling pluripotent cells of pre-implantation embryos (Rossant and Tam,  
6 2017; Weinberger et al., 2016). This difference has profound consequences on the cell's  
7 properties, including the epigenetic state and differentiation capacity (Dong et al., 2019). Naïve  
8 hPSCs have decreased DNA methylation levels, altered distribution of histone marks, and two  
9 active X-chromosomes, and they have a higher propensity to differentiate into extraembryonic  
10 tissues (Castel et al., 2020; Cinkornpumin et al., 2020; Dong et al., 2020; Guo et al., 2021; Io  
11 et al., 2021; Linneberg-Agerholm et al., 2019; Pastor et al., 2016; Sahakyan et al., 2017;  
12 Takashima et al., 2014; Theunissen et al., 2016; Vallot et al., 2017). On the other hand, primed  
13 hPSCs represent the last stage before differentiation into the three definitive germ layers –  
14 ectoderm, mesoderm and endoderm – from which the adult organs are derived (Weinberger et  
15 al., 2016).

16 Importantly, these pluripotent states are established by using specific and distinct  
17 culture conditions (Taei et al., 2020). Of particular interest, primed hPSCs rely on  
18 TGF $\beta$ /Activin/Nodal signalling to maintain their self-renewal and differentiation capacity  
19 (James et al., 2005; Vallier et al., 2005). Inhibition of these pathways or knock down of their  
20 effectors – SMAD2/3 – result in the rapid differentiation towards the neuroectoderm lineage  
21 (Smith et al., 2008). Conversely, an increased activity of these signalling pathways is necessary  
22 for endoderm differentiation (D'Amour et al., 2005; Touboul et al., 2010). The mechanisms  
23 behind these apparent divergent functions remain to be fully uncovered, but the capacity of  
24 SMAD2/3 to switch partners during differentiation is likely to play a key role (Brown et al.,  
25 2011). Of note, Epiblast Stem Cells (EpiSCs) derived from post-implantation mouse embryos  
26 also rely on TGF $\beta$ /Activin/Nodal signalling (Brons et al., 2007). Furthermore, genetic studies  
27 in the mouse have shown that Nodal signalling is necessary to block neuroectoderm  
28 differentiation and to maintain the expression of pluripotency markers in the post-implantation  
29 epiblast (Camus et al., 2006; Mesnard et al., 2006). Thus, the central role of  
30 TGF $\beta$ /Activin/Nodal in primed pluripotency seems to be evolutionary conserved and is  
31 important for normal development.

32 In contrast, the function and evolutionary conservation of TGF $\beta$ /Activin/Nodal  
33 signalling in pre-implantation embryos is less well understood. TGF $\beta$ /Activin/Nodal signalling  
34 does not have an essential role in forming the pre-implantation epiblast in mouse (Brennan et

1 al., 2001; Varlet et al., 1997), whereas recent studies have suggested that the same pathway  
2 may be necessary for epiblast development in human blastocysts (Blakeley et al., 2017). The  
3 mechanistic basis for these observations are unclear. Moreover, it also remains to be  
4 established whether TGF $\beta$  signalling is required to maintain naïve hPSCs, which are the *in*  
5 *vitro* counterparts of pre-implantation epiblast cells. In general, naïve pluripotency is believed  
6 to be a steady state induced predominantly by blocking differentiation signals. However, the  
7 culture conditions vary between laboratories, although interestingly, most media that support  
8 naïve hPSCs contain exogenous TGF $\beta$ /Activin or a source of TGF $\beta$  provided by inactivated  
9 fibroblasts or Matrigel-coated substrates (Bayerl et al., 2021; Chan et al., 2013; Gafni et al.,  
10 2013; Guo et al., 2016; Takashima et al., 2014; Theunissen et al., 2014). Collectively, these  
11 observations suggest there could be an uncharacterised role for TGF $\beta$ /Activin/Nodal signalling  
12 specifically in the human naïve pluripotent state.

13 Here we address this hypothesis by first establishing that TGF $\beta$ /Activin/Nodal  
14 signalling is active in naïve hPSCs. Using genome-wide analyses, we then show that SMAD2/3  
15 is bound near to genes that characterise the naïve pluripotent state. Furthermore, loss of  
16 function experiments demonstrate that this signalling pathway is necessary to maintain the  
17 expression of key pluripotency genes, such as *NANOG*. We then perform single-cell RNA  
18 sequencing analyses on naïve and primed hPSCs that are undergoing differentiation following  
19 the inhibition of TGF $\beta$ /Activin/Nodal signalling. In these conditions, primed hPSCs rapidly  
20 decrease pluripotency markers and activate neuroectoderm genes, whereas naïve hPSCs induce  
21 trophoctoderm markers. Importantly, these analyses also suggest that SMAD2/3 directly  
22 maintains an important part of the transcriptional network characterising the naïve state. Taken  
23 together, these results show that TGF $\beta$ /Activin/Nodal signalling is necessary to maintain the  
24 pluripotent state of naïve hPSCs through directly sustaining the expression of key pluripotency  
25 genes. These new insights suggest that the function of TGF $\beta$ /Activin/Nodal signalling in  
26 human pluripotency extends to earlier stages of development than previously anticipated,  
27 thereby underlying a key species divergence that could facilitate the identification and the  
28 isolation of pluripotent states *in vitro*.



## 1 Results

2

### 3 TGF $\beta$ signalling pathway is active in human naïve pluripotent cells

4 To assess whether the key effectors of the TGF $\beta$  signalling pathway are expressed in naïve  
5 hPSCs and to evaluate the cell heterogeneity in their expression (Figure 1a; Figure supplement  
6 1a, b), we performed single cell transcriptomic analysis (scRNA-seq) in naïve and primed  
7 hPSCs (Figure 1b, Figure supplement 1c). As expected, naïve and primed hPSCs clustered  
8 separately based on their transcriptomes. All cells expressed pan-pluripotency genes, such as  
9 *POU5F1* (also known as *OCT4*), *NANOG* and *SOX2*, however, naïve cells uniquely expressed  
10 known naïve cell markers, such as *DPPA5* and *KLF4*, and primed cells expressed *CD24* and  
11 *ZIC2* (Figure 1c, d; Figure supplement 1c). In addition, differential expression analysis  
12 confirmed the specific expression of naïve hPSCs genes, such as *KLF4*, *DPPA3* and *TFCP2L1*,  
13 and primed hPSCs factors including *DUSP6*, *ZIC2* and *TCF4* (Figure 1d). Importantly, we  
14 found that most TGF $\beta$  pathway effectors, such as Activin receptors (*ACVRs*) and *SMAD2-4*,  
15 are expressed at similar levels in both pluripotent cell types (Figure 1e). Interestingly, several  
16 components, including *NODAL* and *GDF3*, have higher expression levels in naïve compared  
17 to primed hPSCs (Figure 1e).

18 We next examined RNA-seq datasets that covered different stages of human  
19 pluripotency in stem cell lines and in embryos (Figure 1f). We first compared naïve and primed  
20 hPSCs (Collier et al., 2017) and, consistent with our scRNA-seq data, we found that most  
21 ligands, transduction proteins and receptors of the TGF $\beta$  pathway are expressed at similar  
22 levels in the two cell types (Figure 1f). Higher expression of the TGF $\beta$  ligands *NODAL* and  
23 *GDF3* and the co-receptor *TDGF1* was again detected in naïve hPSCs. Interestingly, the  
24 expression of pathway inhibitors differed, whereby *LEFTY1* and *LEFTY2* were higher in naïve  
25 hPSCs, whereas *CER1* and *FST* were higher in primed hPSCs. We then looked at gene  
26 expression changes that occur during the process of capacitation, because the transition from  
27 naïve to primed hPSCs recapitulates pre- to post-implantation epiblast cell development  
28 (Rostovskaya et al., 2019). We found that most of the effectors of the TGF $\beta$  pathway are  
29 expressed throughout the entire developmental series, and also confirmed that *NODAL* and  
30 *GDF3* are expressed at higher levels in the early stages (Figure 1f).

31 To examine transcriptional events directly in human embryos, we next looked at  
32 scRNA-seq data in human pre-implantation embryos from day 3 to day 7 (Petropoulos et al.,  
33 2016). Low level expression of most TGF $\beta$  pathway effectors was detected in the early inner  
34 cell mass (ICM), and their expression increased substantially in the pre-implantation epiblast

1 (EPI). In particular, *NODAL* and *GDF3* are highly expressed in EPI at this stage, similar to the  
2 transcriptional patterns in naïve hPSCs (Figure 1f). However, in contrast to EPI, most pathway  
3 components are undetectable in trophectoderm (TE and early TE), and are expressed at low  
4 levels in primitive endoderm (PE) (Figure 1f). These observations were extended by examining  
5 the expression of TGF $\beta$  pathway genes in a blastocyst-culture system that recapitulates EPI  
6 development from pre-implantation to early gastrulation (Xiang et al., 2020). Here, in EPI cells  
7 at 6 days post-fertilisation, *NODAL*, *GDF3* and the NODAL co-receptor *TDGFI* are highly  
8 expressed, in line with the EPI stage from the Petropoulos et al. dataset, and the high expression  
9 of these genes is sustained in all EPI cells over the following eight days of development (Figure  
10 1f). Taken together, these results show that most ligands, transduction proteins and receptors  
11 of the TGF $\beta$  pathway are expressed at similar levels in naïve and primed hPSCs, and that this  
12 expression pattern across pluripotent states is also observed in human embryos cultured *in*  
13 *vitro*.

14 To further confirm these observations at the protein level, we examined cell-surface  
15 proteomic (Wojdyla et al., 2020) and whole-cell proteomic (Di Stefano et al., 2018) data in  
16 naïve and primed hPSCs. This revealed that most Activin/TGF $\beta$  receptors and downstream  
17 effectors of the pathways are expressed at very similar levels in the two cell types (Figure 1g,  
18 Figure supplement 1d). Finally, to directly assess TGF $\beta$  pathway activation, we performed  
19 western blot analysis and found that phospho-SMAD2 (pSMAD2), the activated form of  
20 SMAD2, is detectable in multiple embryo-derived and reprogrammed naïve hPSCs lines, and  
21 at comparable levels to primed cells (Figure 1h; Figure supplement 1e, f). The phosphorylation  
22 signal was rapidly diminished following the treatment of the cells with SB-431542 (SB), a  
23 potent and selective inhibitor that blocks TGF $\beta$ /Activin receptors ALK5, ALK4, and ALK7  
24 (Inman et al., 2002) (Figure 1h; Figure supplement 1e, f). Taken together, these results establish  
25 that the TGF $\beta$  signalling pathway is active in naïve hPSCs. Because primed hPSCs rely on this  
26 pathway to maintain pluripotency, our findings raise the possibility that naïve hPSCs might  
27 also require TGF $\beta$  signalling to sustain their undifferentiated state.

28

### 29 **SMAD2/3 binding is enriched at active enhancers in human naïve cells**

30 Having established that the TGF $\beta$  signalling pathway is active in naïve hPSCs, we next profiled  
31 the genome-wide occupancy of the main downstream effectors – SMAD2/3 – using chromatin  
32 immunoprecipitation combined with genome-wide sequencing (ChIP-seq) in naïve and primed  
33 hPSCs. This analysis revealed that SMAD2/3 binding is enriched in naïve cells to a similar  
34 degree as in primed cells, as shown by independent peak calling in the two cell types (Figure

1 2a; Figure supplement 2a). Here, we observed regions bound by SMAD2/3 in both cell types,  
2 and also a substantial number of loci that appear to have cell type-specific binding. Importantly,  
3 canonical target genes, such as *LEFTY1/2*, *NODAL*, *NANOG* and *SMAD7*, were bound by  
4 SMAD2/3 in both cell types (Figure 2b; Figure supplement 2b), suggesting that TGF $\beta$  is active  
5 and it signals through the canonical cascade in both naïve and primed hPSCs.

6 In addition to the shared targets, differential binding analyses revealed over 2,000  
7 SMAD2/3-bound sites that differed between the two cell types (Figure 2c, d; Figure  
8 supplement 2c, d). Excitingly, further examination of these differential sites revealed that in  
9 naïve hPSCs SMAD2/3 uniquely bound near to naïve-specific pluripotency genes including  
10 *DNMT3L*, *TFAP2C*, *CBFA2T2*, *KLF4* and *CDK19* (Figure 2e; Figure supplement 2d, e).  
11 Interestingly, these sites often overlapped with accessible chromatin regions and H3K27ac  
12 marks, which are signatures that are associated with active enhancers (Heintzman et al., 2009)  
13 (Figure 2e; Figure supplement 2e). In contrast, primed-specific SMAD2/3 sites were located  
14 near to genes that regulate mesendoderm differentiation, such as *TBXT*, *EOMES* and *GATA4*,  
15 or primed-state pluripotency, such as *OTX2* (Figure 2e, Figure supplement 2e). These sites  
16 correspond mostly to accessible chromatin and to regions marked by H3K4me3 and  
17 H3K27me3 signals, which typically mark the promoters of developmental genes (Azuara et  
18 al., 2006; Bernstein et al., 2006; Heintzman et al., 2009) (Figure 2e; Figure supplement 2e).  
19 These findings are supported by global analysis using ChromHMM-based chromatin state  
20 annotations (Chovanec et al., 2021), where we found that most SMAD2/3 peaks are indeed  
21 within active chromatin regions, consisting mainly of gene promoters and enhancers (Figure  
22 2f). Interestingly, naïve-specific SMAD2/3 peaks are slightly more enriched at active  
23 enhancers compared to primed-specific peaks (30.6% vs 21.4%), and primed-specific  
24 SMAD2/3 peaks are instead more enriched at promoters (46% vs 26.5%) (Figure 2f; Figure  
25 supplement 2f).

26 There are widespread differences in enhancer activity between naïve and primed hPSCs  
27 (Barakat et al., 2018; Battle et al., 2019; Chovanec et al., 2021) and so to determine how  
28 changes in SMAD2/3 occupancy tracks with enhancer status we compared chromatin marks at  
29 naïve-specific SMAD2/3 sites between the two cell types. The vast majority of sites that lose  
30 SMAD2/3 occupancy in primed hPSCs also show a strong reduction in chromatin accessibility  
31 and H3K27ac/H3K4me1 signals, which suggests that SMAD2/3-bound enhancers are  
32 decommissioned in primed hPSCs (Figure 2g). Chromatin marks that denote promoters and  
33 heterochromatin regions are generally low at naïve-specific SMAD2/3 sites and are largely

1 unchanged in primed hPSCs, further reinforcing the connection between SMAD2/3 occupancy  
2 and active enhancers in naïve hPSCs (Figure 2h).

3 To obtain a more complete view of the pluripotency transcriptional network, we also  
4 overlapped SMAD2/3 peaks in naïve cells with OCT4, SOX2 and NANOG (OSN) binding  
5 (Chovanec et al., 2021). We found that OSN signals were strongly reduced at naïve-specific  
6 SMAD2/3 sites in primed hPSCs, confirming the integration of SMAD2/3 within the naïve  
7 transcription factor network (Figure 2i). Importantly, regions bound by SMAD2/3 and OSN  
8 overlapped with state-specific enhancers that are marked by open chromatin and H3K27ac, as  
9 shown for the *KLF4* and *DNMT3L* loci in naïve hPSCs, and for *OTX2* and *TBXT* in primed  
10 hPSCs (Figure 2e). Finally, to further characterise the differentially bound loci, we performed  
11 differential motif enrichment to investigate whether different binding partners might regulate  
12 SMAD2/3 binding in naïve and primed cells. Interestingly, motifs that are relatively enriched  
13 at SMAD2/3 sites in naïve compared to primed cells included NF2L1 (also known as NRF1),  
14 TFAP2A/C, KLF4 and FOXH1 (Figure 2j).

15 Altogether, these data suggest that SMAD2/3, the main effector of TGF $\beta$  pathway, is  
16 integrated in the naïve pluripotency network by targeting OSN-bound active enhancers that are  
17 in close proximity to key regulators of naïve pluripotency.

18

### 19 **Inhibiting TGF $\beta$ signalling induces loss of pluripotency in human naïve cells**

20 After establishing that the TGF $\beta$  signalling pathway could maintain directly the transcriptional  
21 network characterising human pluripotency, spanning from naïve to primed states, we next  
22 examined whether the pathway is functionally required to sustain naïve hPSCs in an  
23 undifferentiated state. We first measured the transcriptional changes that occurred in response  
24 to SB-mediated loss of pSMAD2 and inhibition of the TGF $\beta$  pathway (Figure 3a; Figure  
25 Supplement 3a, b). After only two hours of SB treatment (t2iLGö medium supplemented with  
26 SB), naïve hPSCs showed a significant reduction in the expression of the pluripotency gene  
27 *NANOG*, which is a short time frame that is consistent with *NANOG* being a direct target of  
28 SMAD2/3 signalling (Vallier et al., 2009; Xu et al., 2008) (Figure 3a, Figure supplement 3a).  
29 Other canonical downstream target genes, such as *LEFTY1/2* and *SMAD7*, were also strongly  
30 downregulated and their expression was completely abolished after 24 hours in the case of  
31 *LEFTY1/2*. Excitingly, naïve pluripotency marker genes that are bound by SMAD2/3 including  
32 *DPPA3*, *DPPA5*, *KLF4* and *DNMT3L* were also downregulated following SB treatment,  
33 indicating that the naïve state is disrupted in these conditions (Figure 3a, Figure supplement  
34 3a). These results were independently validated by depleting SMAD2/3 expression using the

1 OPTiKD system (Bertero et al., 2016). Here, we generated stable naïve hPSCs with tetracycline  
2 (TET) inducible co-expression of shRNAs that target *SMAD2* and *SMAD3* transcripts (Figure  
3 3b). Treating these cells with TET induced the rapid loss of *SMAD2/3* mRNA (Figure 3c), and  
4 a concomitant and significant downregulation in the expression of *SMAD2/3* target genes, such  
5 as *LEFTY2*, *NODAL* and *NANOG* (Figure 3c). We also detected a significant decrease in  
6 *POU5F1* expression following *SMAD2/3* knockdown and after SB treatment, suggesting that  
7 naïve hPSCs are destabilised and are exiting the pluripotent state (Figure 3a, c).

8 Interestingly, adding SB to naïve culture media also induced a change in cell  
9 morphology whereby naïve hPSCs lost their typical dome-shaped morphology after 3 to 5 days,  
10 and this was accompanied by the appearance of flat colonies that gradually took over the culture  
11 (Figure 3d, Figure supplement 3c). This striking phenotypic change was confirmed in a second  
12 naïve hPSCs line (Figure supplement 3d). Intriguingly, the morphology of these flat colonies  
13 resemble human trophoblast cells (Okoe et al., 2018). To further investigate this, we grew naïve  
14 hPSCs for 14 days in the presence of SB and then examined the expression of trophoblast  
15 marker genes (Figure 3e). We found there was a strong upregulation in the expression of the  
16 trophoblast marker *HAND1* and also of *TP63*, *MMP2* and *SDCI* that mark cytotrophoblast  
17 (CTB), extravillous trophoblast (ETV) and syncytiotrophoblast (STB) cell types, respectively  
18 (Figure 3e). These results were further supported by the clear reduction in *NANOG* protein  
19 expression following 3 to 5 days of treating naïve hPSCs with SB, in correspondence with the  
20 exit from naïve pluripotency and the appearance of the trophoblast-like colonies (Figure 3f).  
21 *NANOG* downregulation together with the appearance of trophoblast-like colonies was also  
22 observed in a second naïve cell line upon SB treatment (Figure supplement 3e). Importantly,  
23 the flat cell colonies also expressed typical trophoblast-associated proteins – *GATA3* and  
24 *HAND1* (Figure 3g, Figure supplement 3f, g).

25 To further characterise these cells and to investigate their ability to differentiate into  
26 trophoblast derivatives, we cultured naïve hPSCs in the presence of SB for 5 days and then  
27 transferred the cells into trophoblast stem cell (TSC) media (Dong et al., 2020; Okoe et al.,  
28 2018). Although the cell population initially appeared heterogeneous, following exposure to  
29 TSC conditions the cells rapidly and uniformly acquired a homogeneous TSC-like  
30 morphology. The cells expressed TSC markers, such as *GATA3* and *CK19* (Figure 3h) and  
31 *CK7*, *ITGA6* and *TP63* (Figure 3i), and could be passaged and maintained in these conditions  
32 with stable growth and morphology. Naïve-derived TSCs were then induced to differentiate by  
33 switching the cells to STB and EVT media (Dong et al., 2020). This led to the downregulation

1 of TSC genes and the upregulation of STB and EVT markers, such as SDC1 and HLA-G,  
2 respectively (Figure 3h, i).

3 Taken together, these results show that blocking TGF $\beta$  signalling in naïve hPSCs  
4 rapidly destabilises the pluripotency network and allows the cells to undergo differentiation  
5 towards trophoblast-like cells, including those that can give rise to multipotent, proliferative  
6 TSCs.

### 7 8 **Single-cell transcriptional analysis reveals a trophoblast-like population arising in** 9 **response to TGF $\beta$ inhibition in human naïve cells**

10 We next sought to investigate the processes in which TGF $\beta$  pathway inhibition drives naïve  
11 hPSCs out of their pluripotent state and towards a trophoblast phenotype. Following SB  
12 treatment, we observed that the early-stage cultures contained a heterogeneous mixture of cell  
13 morphologies that included naïve-like colonies and the flat, TSC-like colonies described above  
14 (Figure 3d, Figure supplement 3c, d). The proportion of NANOG-positive cells declined  
15 following SB treatment, with variable expression within individual colonies (Figure 3f). We  
16 also observed heterogeneous colonies that contained cells expressing the pluripotency marker  
17 OCT4 and TSC-like markers HAND1/GATA3 (Figure 3g). Because the population  
18 heterogeneity could mask important changes in cell phenotype, we used scRNA-seq to examine  
19 the effect of TGF $\beta$  inhibition over seven days of SB treatment in naïve hPSCs (Figure 4a). In  
20 addition, to better characterise the divergent developmental potential between different human  
21 pluripotent states, we compared this response to the response when primed hPSCs were treated  
22 with SB. Our aim was to investigate the trajectory of naïve hPSCs moving into a putative TSC-  
23 like population, in contrast with the neuroectodermal differentiation that is induced in primed  
24 hPSCs when TGF $\beta$  is inhibited (Vallier et al., 2009).

25 In both cell types, there was a clear transcriptional trajectory moving from day 0 to day  
26 7 of SB treatment (Figure 4b, Figure supplement 4a). Importantly, there was little overlap in  
27 their trajectories (Figure 4c), confirming that the inhibition of TGF $\beta$  signalling in these two  
28 different developmental stages results in divergent differentiation processes. Louvain  
29 clustering of the combined datasets also showed separated clusters in the naïve and primed  
30 time course samples (Figure supplement 4b). Specifically, TGF $\beta$  inhibition in naïve hPSCs  
31 induced the expression of TSC-like markers, such as *HAND1*, *GATA2* and *GATA3*, whereas  
32 inhibition in primed hPSCs induced neuroectoderm markers, such as *SOX10*, *PAX6* and *LEF1*  
33 (Figure 4d, Figure supplement 4c). Interestingly, Louvain clustering of the naïve cell dataset  
34 initially follows the day 0 (Cluster A) and day 1 (Cluster B) timepoints and then resolves the



1 mixed population at days 3, 5 and 7 into three separate clusters (C, D and E) (Figure 4e, Figure  
2 supplement 4d). This analysis suggests that the mixed population is formed from an early  
3 differentiating population (cluster C), a transition population (cluster D), and a later-stage  
4 differentiated population (cluster E), thereby confirming a stepwise process marked by  
5 different intermediate stages.

6 Examining individual genes revealed the dynamics of the differentiation trajectory.  
7 Pan-pluripotency and naïve-specific genes showed a gradient in their expression patterns,  
8 starting from high expression in cluster A, diminishing levels in clusters B and C, then largely  
9 absent in clusters D and E (Figure 4f, g). In contrast, trophoblast genes become activated in  
10 clusters C, D and E, with *CDX2*, *HAND1* and *GATA3* marking early, transition and late-stage  
11 differentiating populations, respectively (Figure 4f, g). *NODAL* and *LEFTY1* are expressed  
12 predominantly in cluster A and were rapidly downregulated already in cluster B (Figure 4f, g),  
13 and other TGF $\beta$  pathway genes, such as *GDF3* and *TDGFI*, are fully downregulated when  
14 cells start transitioning towards cluster D. These results confirm the effective pathway  
15 inhibition and also that blocking TGF $\beta$  signalling allows trophectoderm differentiation.

16 To better characterise the Louvain clusters, we examined the top 25 genes that are  
17 differentially expressed in each cluster compared to all other clusters (Figure 4g, Figure  
18 supplement 4e, f). Differentially expressed genes that are associated with cluster A, which  
19 corresponds largely to cells at day 0, include *NANOG* and *SUSD2* (Bredenkamp et al., 2019a;  
20 Wojdyla et al., 2020) in addition to the TGF $\beta$  ligand *GDF3* and receptor *TDGFI*. Interestingly,  
21 the SMAD2/3-cofactor *FOXH1* was also identified in this category and this is consistent with  
22 our prior motif analysis of the SMAD2/3 ChIP-seq data that identified FOXH1 as a putative  
23 interactor of SMAD2/3 specifically in naïve cells (Figure 2j). Genes that are differentially  
24 expressed in cluster B are enriched for metallothioneins, such as MT1/2s, which affect cell  
25 respiration, in addition to mitochondrial genes – *SLIRP* and *MTNDL4* – and the glucose  
26 pyrophosphorylase *UGP2*, suggesting that an initial response to TGF $\beta$  inhibition could involve  
27 a metabolic switch (Mathieu and Ruohola-Baker, 2017). Cells in cluster C still express  
28 pluripotency markers, such as *POU5F1* and *DPPA5*, and have upregulated the non-coding  
29 RNAs *MEG3* and *MEG8*. Cluster D clearly marks a transition population towards TSC-like  
30 cells, with the expression of *CDX1* and *CDX2*, keratins (*KRT8*, *KRT18*), and *MARCKS*, *FABP5*  
31 and *EZR* (Cambuli et al., 2014; Ralston et al., 2010). Cluster E includes keratins (*KRT8*,  
32 *KRT18*, *KRT19*), several main regulators of trophoblast development, such as *GATA2* and  
33 *GATA3* (Ralston et al., 2010), and human specific regulators, such as *VGLLI* (Soncin et al.,  
34 2018). Lastly, because recent studies have highlighted a transcriptional overlap between

1 trophoblast and amnion cells (Guo et al., 2021; Io et al., 2021; Zhao et al., 2021), we examined  
2 whether genes reported to be expressed by amnion cells were upregulated in our dataset. We  
3 found that most of the amnion-associated genes examined were not detectable in any of the  
4 clusters (Figure supplement 4g). Some markers, such as *CTSV* and *TPMI*, are expressed in  
5 both amnion and trophoblast, and as expected were upregulated in cluster E (Figure supplement  
6 4g). Although it is currently challenging to separate the transcriptional profiles of trophoblast  
7 and amnion cells, this analysis suggests that TGF $\beta$  inhibition of naïve hPSCs in these  
8 conditions does not promote the induction of reported amnion cell markers. Taken together,  
9 these results confirm that TGF $\beta$  inhibition downregulates a pluripotency program and enables  
10 trophoctoderm differentiation from naïve hPSCs.

11 To dissect the impact of TGF $\beta$  pathway inhibition on the transcriptional changes, we  
12 overlapped cluster A and E gene expression profiles with SMAD2/3 ChIP-seq peaks. We found  
13 that a small subset of differentially expressed genes have a nearby SMAD2/3 peak (Figure 4h).  
14 Of note, many of the strongest peaks are close to differentially expressed genes, and this was  
15 especially clear for genes that are downregulated upon SB treatment (Figure 4i). Interestingly,  
16 among the downregulated genes, we found that SMAD2/3 bind within 12kb of the  
17 transcriptional start sites of TGF $\beta$  downstream effectors (*NODAL*, *LEFTY1/2*, *PMEPA1*), key  
18 genes associated with naïve pluripotency (*DNMT3L*, *DPPA4*, *AIRE*, *IDI1*), genes reported to  
19 inhibit trophoblast differentiation (*NLRP7*, *TET1*) (Alici-Garipcan et al., 2020; Dawlaty et al.,  
20 2011; Koh et al., 2011; Mahadevan et al., 2014), and also near to distal enhancers for other  
21 factors, such as *KLF4* and *DEPTOR* (Figure 4h). Although less prevalent, we also found  
22 SMAD2/3 binding sites close to some genes that are transcriptionally upregulated between  
23 cluster A and E, including *EFNB2* and *FOS*, and to enhancers close to *PGF* and *MFAP5*. To  
24 further assess the significance of this association, we tested how often differentially expressed  
25 genes between clusters A and E are the closest gene to a SMAD2/3 peak. Strikingly, 21% of  
26 downregulated genes are the closest gene to a SMAD2/3 binding site, which is significantly  
27 higher than the 7% of genes in a randomly-selected group of size-matched control genes  
28 ( $p < 2.2 \times 10^{-16}$ , Figure 4j). These results suggest that the downregulation of pluripotency-  
29 associated genes following TGF $\beta$  inhibition is functionally linked to the loss of SMAD2/3  
30 binding.

31 Taken together, scRNA-seq in primed and naïve cells shows that both developmental  
32 stages rely on TGF $\beta$  signalling to maintain their undifferentiated state but, upon pathway  
33 inhibition, each cell type diverges towards different trajectories. Primed cells differentiate into  
34 neuroectoderm cells whereas, in contrast, naïve cells exit pluripotency and acquire a TSC-like



1 fate expressing trophoblast markers and this is triggered by the deregulation of target genes  
2 that are downstream of SMAD2/3.

3

#### 4 **TGF $\beta$ inhibition in naïve hPSCs recapitulates the transcriptome of early trophoblast** 5 **specification in human embryos**

6 Having established that naïve hPSCs respond to TGF $\beta$  inhibition by shutting down the naïve  
7 pluripotency network, thereby allowing the onset of trophoblast differentiation, we next  
8 investigated whether this differentiation process follows a developmental trajectory. To do this,  
9 we applied diffusion pseudotime to our 10X scRNA-seq data (Figure supplement 5a) and  
10 examined the pseudotime trajectory across the Louvain clusters (Figure 5a). Consistent with  
11 the prior UMAP analysis, we found that the time points (days) and the clusters progressively  
12 populate the trajectory following a similar pattern from cluster A, through B and C, towards a  
13 transition population in cluster D, and lastly the more differentiated counterpart in cluster E  
14 (Figure 5a). Overlaying the diffusion pseudotime maps with the expression of known markers  
15 reveals the initial downregulation of pluripotency genes, such as *NANOG*, was followed by a  
16 sequential upregulation of trophoblast markers, such as *CDX2*, *HAND1* and *GATA3* (Figure  
17 5b, Figure supplement 5b). Interestingly, the transitional cell population in cluster D contains  
18 a substantial proportion of cells (~15-25%) that co-express low levels of the pluripotency gene  
19 *POU5F1* and trophoblast markers, such as *CDX2* and *HAND1* (Figure 5c). We confirmed this  
20 co-expression at the protein level using immunofluorescent microscopy (Figure supplement  
21 5c). These results indicate that trophoblast cells arise in the population through the transition  
22 of pluripotent cells to a trophoblast fate.

23 To further investigate the transition from naïve pluripotency to trophoblast  
24 specification, we compared our scRNA-seq data to human embryo transcriptional datasets  
25 (Xiang et al., 2020). Correlation analysis showed that cells in clusters A, B and C are  
26 transcriptionally closest to epiblast cells, in keeping with their undifferentiated status (Figure  
27 supplement 5d). The transitional population classified as cluster D has the highest correlation  
28 with ICM and TE (Figure supplement 5d). Cells in cluster E have the highest correlation with  
29 trophoblast derivatives from the pre- and early-postimplantation embryo (Figure supplement  
30 5d).

31 We next focussed our analysis on the main pluripotent cell population (cluster A), the  
32 transitioning cells (cluster D) and the differentiated cells (cluster E). We compared these  
33 clusters with the embryo cell types that showed the highest transcriptional correlations to them  
34 (Figure 5d and Figure supplement 5d). Visualising single cell transcriptomes for each cell type

1 on a PCA plot revealed there was a good overlap between our stem cell differentiation series  
2 and the embryo lineages (Figure 5e), further supporting a transition from EPI to the trophoblast  
3 lineage. We then used the Wilcoxon Rank Sum test to identify marker genes for each embryo  
4 lineage and examined the expression pattern of those genes in cells across clusters A, D and E.  
5 Interestingly, the two datasets have remarkably similar expression patterns, whereby the  
6 progression from clusters A to D to E closely resembles the transcriptional changes from EPI  
7 to trophoblast (Figure 5f). Among the top 20 genes per cluster (Figure supplement 5e), we  
8 found genes, such as *NANOG* and *DPPA5* for cluster A / EPI, and trophoblast markers, such  
9 as *VGLL1* and *PGF* for cluster E / trophoblast, and confirmed their expression at the single cell  
10 level over the differentiation pseudotime (Figure 5g). Taken together, these results reveal that  
11 TGF $\beta$  inhibition of naïve hPSCs causes the cells to initiate a differentiation programme from  
12 pluripotency to TE-like cells and trophoblast derivatives, activating transcriptional identities  
13 similar to the embryo counterpart

14  
15

## 16 **Discussion**

17 Here we show that TGF $\beta$ /Activin/Nodal signalling is active in naïve hPSCs and that this  
18 pathway is required to maintain the cells in an undifferentiated state. These findings, therefore,  
19 establish that there is a continuum for TGF $\beta$  signalling function in pluripotency spanning a  
20 developmental window from naïve to primed states (Figure 5h).

21 Until now, the role of TGF $\beta$  signalling in naïve hPSCs has been unclear. Activators of  
22 this pathway are often included in naïve hPSCs culture formulations (Bayerl et al., 2021; Chan  
23 et al., 2013; Theunissen et al., 2014), suggesting that this pathway could be necessary to  
24 maintain pluripotency. Accordingly, we show here that naïve hPSCs transcribe high levels of  
25 endogenous TGF $\beta$  ligands and receptors, and the pathway is activated in standard naïve cell  
26 growth conditions as demonstrated by the phosphorylation status of SMAD2/3. These findings  
27 help to interpret previous observations from several studies. For example, when testing  
28 different culture formulations, the removal of Activin from 5iLA conditions led to an increase  
29 in the spontaneous differentiation of naïve hPSCs, and also to the reduced expression of naïve  
30 genes, including *NANOG* and *KLF4* (Theunissen et al., 2014). Furthermore, supplementing  
31 HENSM media with Activin caused naïve hPSCs to express higher levels of *KLF17*, *DNMT3L*  
32 and *DPPA3* (genes that are confirmed as SMAD2/3 targets in our study) and elevated *POU5F1*  
33 distal enhancer activity, compared to the same conditions without Activin (Bayerl et al., 2021).  
34 In addition to the effect on established naïve cell lines, Activin also enhanced the kinetics of

1 primed to naïve hPSCs reprogramming (Theunissen et al., 2014). At the time, the authors  
2 speculated that Activin prolongs primed hPSCs in a state that is amenable to naïve  
3 reprogramming. Based on the results from our study, we propose that TGF $\beta$  signalling is  
4 required to maintain pluripotency in cells throughout primed to naïve cell reprogramming and  
5 additionally enforce the expression of genes that promote naïve hPSCs. Thus,  
6 TGF $\beta$ /Activin/Nodal signalling helps to stabilise naïve pluripotency and the addition of Activin  
7 to naïve induction and maintenance conditions is predicted to be beneficial.

8 At the molecular level, our analysis showed that SMAD2/3, the DNA-binding effectors  
9 downstream of TGF $\beta$ /Activin/Nodal signalling, occupied genomic sites that were common to  
10 both naïve and primed hPSCs, in addition to a large set of cell type-specific sites. Shared target  
11 genes included core pluripotency factors, such as *NANOG*, in addition to factors that are  
12 canonical targets, such as *LEFTY1/2* and *SMAD7*. Disrupting TGF $\beta$  signalling in naïve and  
13 primed hPSCs caused the rapid downregulation of these common target genes, indicating the  
14 presence of shared gene regulatory networks between the two pluripotent states. We  
15 additionally identified a large set of genes that were targeted by SMAD2/3 in naïve hPSCs but  
16 not in primed hPSCs. This set of genes included *KLF4*, *TFAP2C* and *DNMT3L*, which are  
17 important regulators of naïve pluripotency (Bayerl et al., 2021; Pastor et al., 2018), and we  
18 demonstrated that their expression levels were also sensitive to TGF $\beta$  pathway inhibition.  
19 These findings indicate that TGF $\beta$ /Activin/Nodal signalling functions in naïve hPSCs to  
20 reinforce the expression of key genes that promote naïve pluripotency, rather than to repress  
21 differentiation-promoting factors. Previous studies suggest that TGF $\beta$ /Activin/Nodal  
22 signalling may regulate *NANOG* expression in human embryos (Blakeley et al., 2017). It will  
23 be important to determine in the future whether the signalling requirements we uncover in  
24 naïve hPSCs could also be operating in pluripotent cells of human embryos. If so, then existing  
25 naïve hPSCs may serve as a useful cell model in which to investigate the mechanisms of  
26 signalling pathways that are relevant for early human development, alternatively, if this shows  
27 distinctions it may point to ways in which current *in vitro* conditions may need to be further  
28 refined to more closely recapitulate the pre-implantation embryonic epiblast in the embryo.  
29 Importantly, genetic studies in the mouse have established a key function for Nodal-SMAD2/3  
30 signalling in maintaining the pluripotent state of post-implantation epiblast and in the formation  
31 of the primitive streak during gastrulation (Brennan et al., 2001; Varlet et al., 1997).  
32 Concerning pre-implantation stages, TGF $\beta$ /Activin/Nodal signalling appears to play a role in  
33 the regionalisation of the extraembryonic endoderm. However, a function in the early epiblast

1 remains elusive, thereby suggesting the existence of species divergence regarding  
2 TGF $\beta$ /Activin/Nodal signalling function during early development.

3 Our experiments also uncovered a widespread relocalisation in the genomic sites that  
4 are occupied by SMAD2/3. By integrating our datasets with chromatin and transcription factor  
5 profiles, we found that SMAD2/3 binding was enriched at active enhancers in naïve cells, yet  
6 predominantly at promoters in primed cells. This redistribution mirrors changes in OCT4,  
7 SOX2 and NANOG occupancy, whereby sites bound by SMAD2/3 only in naïve hPSCs are  
8 also preferentially occupied by OSN in naïve compared to primed cells. These findings predict  
9 that SMAD2/3 and OSN integrate signalling and transcription factor inputs in naïve  
10 pluripotency, similar to the functional interaction between SMAD2/3 and NANOG in primed  
11 hPSCs (Brown et al., 2011; Xu et al., 2008). Together, these results establish that TGF $\beta$   
12 signalling is a core feature that is closely integrated within the transcriptional network of naïve  
13 hPSCs.

14 Finally, our single-cell analysis revealed that naïve and primed hPSCs depart along  
15 different trajectories following TGF $\beta$  inhibition. Primed hPSCs differentiated rapidly into  
16 neuroectoderm following TGF $\beta$  inhibition, which is consistent with previous studies (Smith et  
17 al., 2008). In contrast, naïve hPSCs upregulated trophoblast-associated genes after several days  
18 of TGF $\beta$  inhibition. The divergent routes taken by naïve and primed hPSCs could be due to  
19 their different developmental states and differentiation potential. In keeping with their  
20 preimplantation epiblast identity, naïve hPSCs can differentiate efficiently into trophoblast and  
21 hypoblast, and are required to transition through a process of capacitation to acquire the  
22 competency to respond directly to signals that promote postimplantation germ layer induction.  
23 In contrast, primed hPSCs are more similar to early postimplantation epiblast, and therefore do  
24 not efficiently make trophoblast and hypoblast. Additionally, the presence of different factors  
25 and inhibitors in the naïve and primed hPSC culture media could also affect their responses to  
26 TGF $\beta$  inhibition. Importantly, not all of the cells in the inhibitor-treated naïve cultures  
27 differentiated uniformly over the first few days. Thus, we speculate that the presence of small  
28 molecules inhibiting MEK, GSK3 $\beta$ , and PKC with the addition of LIF can attenuate the effect  
29 of TGF $\beta$  inhibition (Guo et al., 2021). Notably, a TGF $\beta$  inhibitor is a common component of  
30 human TSC medium (Okae et al., 2018), which suggests that TGF $\beta$  signalling may act to limit  
31 trophoblast self-renewal or proliferation. TGF $\beta$  inhibitors are also a component in the  
32 conditions that can convert naïve hPSCs to TSCs (Castel et al., 2020; Cinkornpumin et al.,  
33 2020; Dong et al., 2020; Liu et al., 2020). Here, the inhibitor might be functioning in two ways:  
34 to induce the exit from naïve pluripotency, and to promote trophoblast cell growth.

1 Unexpectedly, our single cell analysis revealed that following TGF $\beta$  inhibition, naïve cells  
2 acquire a transcriptional identity closest to ICM and early TE, marked, for example, by  
3 transient *CDX2* expression, and then the cells undergo further differentiation into trophoblast  
4 cell types. *CDX1* and *CDX2* are expressed transiently in primate trophoblast development  
5 including the pre-implantation TE in human blastocysts (Niakan and Eggan, 2013), but are not  
6 expressed in embryo-derived TSCs or naïve hPSC-derived TSCs, which are more similar to  
7 post-implantation trophoblast (Castel et al., 2020; Dong et al., 2020; Okae et al., 2018). By  
8 capturing pre-implantation TE-like cells, our scRNA-seq data could, therefore, shed light on  
9 the transcriptional changes that occur during the early stages of human trophoblast  
10 specification.

11 To conclude, our results establish a central role for TGF $\beta$ /Activin/Nodal signalling in  
12 protecting human pluripotent stem cells against differentiation. This knowledge will be useful  
13 to establish culture conditions allowing the derivation and production *in vitro* of different cell  
14 types constituting the human embryo. In addition, modulation of TGF $\beta$  could play a key role  
15 in the early human embryo and could be useful for improving culture conditions used to grow  
16 human embryos *in vitro*.

## 1 **Materials and Methods**

2

### 3 **Cell culture**

4 Transgene-reset WA09/H9 NK2, embryo-derived HNES1 and chemically-reset cR-H9 naïve  
5 hPSCs (Guo et al., 2017, 2016; Takashima et al., 2014) were kindly provided by Dr. Austin  
6 Smith with permission from WiCell and the UK Stem Cell Bank Steering Committee. Cells  
7 were maintained in t2iLGö (Takashima et al., 2014) or in PGXL (Bredenkamp et al., 2019b;  
8 Rostovskaya et al., 2019) in hypoxia (5% O<sub>2</sub>) at 37°C. The N2B27 base medium contained a  
9 1:1 mixture of DMEM/F12 and Neurobasal, 0.5X N-2 supplement, 0.5X B-27 supplement,  
10 2mM L-Glutamine, 0.1mM β-mercaptoethanol (all from ThermoFisher Scientific), 0.5X  
11 Penicillin/Streptomycin. For t2iLGö, the base medium was supplemented with 1μM  
12 PD0325901, 1μM CHIR99021, 20ng/ml human LIF (all from WT-MRC Cambridge Stem Cell  
13 Institute) and 2μM Gö6983 (Tocris). For PXGL, N2B27 medium was supplemented with 1μM  
14 PD0325901, 2μM XAV939, 2μM Gö6983 and 10 ng/ml human LIF. Naïve hPSCs were  
15 maintained on a layer of irradiated mouse fibroblasts that were seeded at a density of two  
16 million cells per 6-well plate. All experiments have been performed on naïve hPSCs that were  
17 grown in the absence of mouse fibroblasts for at least two passages using Growth Factor  
18 Reduced Matrigel-coated plates (Corning). For TGFβ inhibition experiments, 20μM  
19 SB431542 (Tocris) was added to the medium for the specified length of the experiment.

20 Conventional (primed) WA09/H9 (Thomson et al., 1998) were maintained in E8  
21 medium as previously described (Chen et al., 2011) in DMEM/F12, 0.05% Sodium  
22 Bicarbonate, 2X Insulin-Transferrin-Selenium solution (all from ThermoFisher Scientific),  
23 64μg/ml L-ascorbic acid 2-phosphate (LAA) (Sigma), 1X Penicillin/Streptomycin (WT-MRC  
24 Cambridge Stem Cell Institute), 25ng/ml FGF2 (Hyyönen Group, Dept of Biochemistry) and  
25 2ng/ml TGFβ (BioTechne) on 10μg/ml of Vitronectin XF-coated plates (StemCell  
26 Technologies) at 37°C. For TGFβ inhibition experiments, 10μM SB431542 (Tocris) was added  
27 to the media for the specified length of the experiment.

28 TSCs, ETV and STB cells were generated as previously described (Dong et al., 2020)  
29 with some modifications as follows. WA09/H9 NK2 naïve hPSCs were treated with 10μM  
30 SB431542 (Tocris) in t2iLGö media for 5 days. Cells were dissociated with TrypLE  
31 (ThermoFisher Scientific) and single cells were seeded on Collagen IV-coated plates (5μg/ml;  
32 Sigma) in TSC media (Okoe et al., 2018) comprising of DMEM/F12 supplemented with  
33 0.1mM β-mercaptoethanol, 0.2% FBS, 0.5% Penicillin/Streptomycin, 0.3% BSA, 1% ITS-X  
34 (all from ThermoFisher Scientific), 1.5μg/ml L-ascorbic acid (Sigma), 50ng/ml EGF



1 (Peprotech), 2 $\mu$ M CHIR99021 (WT-MRC Cambridge Stem Cell Institute), 0.5 $\mu$ M A83-01  
2 (Tocris), 1 $\mu$ M SB431542 (Tocris), 0.8mM VPA (Sigma), and 5 $\mu$ M Y-27632 (Cell Guidance  
3 Systems) in 5% CO<sub>2</sub>. The media was changed every two days and cells were passaged with  
4 TrypLE when ~80% confluent. To induce EVT differentiation, dissociated naive-derived TSCs  
5 were seeded onto plates pre-coated with 1 $\mu$ g/ml of Collagen IV (Sigma) in EVT basal media  
6 comprising DMEM/F12 with 0.1mM  $\beta$ -mercaptoethanol, 0.5% Penicillin/Streptomycin, 0.3%  
7 BSA, 1% ITS-X (all ThermoFisher Scientific), 7.5 $\mu$ M A83-01 (Tocris), 2.5 $\mu$ M Y27632 (Cell  
8 Guidance Systems) and supplemented with 4% KSR (ThermoFisher Scientific) and 100ng/ml  
9 NRG1 (Cell Signalling). Matrigel (Corning) was added at 2% final concentration shortly after  
10 resuspending the cells in the media. On day 3, the media was replaced with EVT basal media  
11 supplemented with 4% KSR (ThermoFisher Scientific), and Matrigel (Corning) was added at  
12 0.5% final concentration. On day 6, the media were replaced with EVT basal medium, plus  
13 0.5% Matrigel (Corning). EVTs were cultured for two more days and then collected for  
14 analysis. To induce STB differentiation, dissociated TSCs were seeded in STB media  
15 comprising DMEM/F12 supplemented with 0.1mM  $\beta$ -mercaptoethanol, 0.5%  
16 Penicillin/Streptomycin, 0.3% BSA, 1% ITS-X (all ThermoFisher Scientific), 2.5 $\mu$ M Y-27632  
17 (Cell Guidance Systems), 50ng/ml EGF (Peprotech), 2 $\mu$ M Forskolin (R&D) and 4% KSR  
18 (ThermFisher Scientific) in ultra-low attachment plates to form cell aggregates in suspension.  
19 Fresh media was added on day 3, and samples were collected for analysis on day 6.

20 Authentication of hPSCs was achieved by confirming the expression of pluripotency  
21 genes and protein markers (NANOG and OCT4). Cells were routinely verified as mycoplasma-  
22 free using broth and PCR-based assays. The cell lines are not on the list of commonly  
23 misidentified cell lines (International Cell Line Authentication Committee).

24

## 25 **Western Blotting**

26 For whole cell lysates, cells were washed once in D-PBS and resuspended in ice cold RIPA  
27 buffer (150mM NaCl, 50mM Tris, pH8.0, 1% NP-40, 0.5% sodium deoxycholate, 0.1%  
28 sodium dodecyl sulfate) containing protease and phosphatase inhibitors for 10min. Protein  
29 concentration was quantified by a BCA assay (Pierce) following the manufacturer's  
30 instructions using a standard curve generated from BSA and read at 600nm on an EnVision  
31 2104 plate reader. Samples were prepared by adding 4x NuPAGE LDS sample buffer  
32 (ThermoFisher Scientific) plus 1%  $\beta$ -mercaptoethanol and heated at 95°C for 5min. 5-10 $\mu$ g of  
33 protein per sample was run on a 4%–12% NuPAGE Bis-Tris Gel (ThermoFisher Scientific)  
34 and then transferred to PVDF membrane by liquid transfer using NuPAGE Transfer buffer

1 (ThermoFisher Scientific). Membranes were blocked for 1hr at RT in PBS 0.05% Tween-20  
2 (PBST) supplemented with 4% non-fat dried milk and incubated overnight at 4°C with primary  
3 antibodies diluted in the same blocking buffer, or 5% BSA in case of phosphor-proteins. After  
4 three washes in PBST, membranes were incubated for 1h at RT with horseradish peroxidase  
5 (HRP)-conjugated secondary antibodies diluted in blocking buffer, then washed a further three  
6 times before being incubated with Pierce ECL2 Western Blotting Substrate (ThermoFisher  
7 Scientific) and exposed to X-Ray Film. Membranes were probed with antibodies in Table 1.  
8 Relative quantification was performed using Fiji (ImageJ). Western blots were performed in  
9 three different lines, with the NK2 line in biological duplicate (Figure 1 and Supplementary  
10 Figure 1 and 3).

11

### 12 **RNA extraction and quantitative reverse transcription PCR (RT-qPCR)**

13 Total RNA was extracted with the GeneElute Total RNA kit (Sigma). The on-column DNase  
14 digestion step was performed (Sigma) to remove any genomic DNA contamination. 500ng of  
15 total RNA was used to synthesize cDNA with SuperScript II (ThermoFisher Scientific) using  
16 Random primers (Promega) following manufacturer's instructions. cDNA was diluted 30-fold  
17 and 2.5µl was used to perform Quantitative PCR using Kapa SYBR fast Low-Rox (Sigma) in  
18 a final reaction volume of 7.5µl on a QuantStudio 5 384 PCR machine (ThermoFisher  
19 Scientific). Samples were run in technical duplicate as two wells in the same qPCR plate and  
20 results were analysed using *PBGD/RPLP0* as housekeeping genes. All experiments were run  
21 in biological triplicate unless specified in the figure legends. Biological replicates were defined  
22 as separate experiments using the same line from three different passages performed at  
23 different times. All primer pairs were validated to ensure only one product was amplified and  
24 with a PCR efficiency of 100% (±10%). Primer sequences used are displayed in Table 2.

25

### 26 **SMAD2/3 iKD line and reprogramming**

27 Validated short hairpin RNA (shRNA) sequences against SMAD2  
28 (CCGGCAAGTACTCCTTGCTGGATTGCTCGAGCAATCCAGCAAGGAGTACTTGTT  
29 TTTG) and SMAD3  
30 (CCGGCCTCAGTGACAGCGCTATTTCTCGAGAAATAGCGCTGT  
31 CACTGAGGCTTTTTG) were obtained from Sigma. Construction and transfection of the  
32 sOPTiKD plasmid as well as cloning were carried out as described in (Bertero et al., 2018).  
33 GeneJuice Transfection Reagent (Sigma) was used for transfection.



1            Primed SMAD2/3 inducible knockdown hPSCs were reprogrammed to a naïve state in  
2 5i/LA conditions (Theunissen et al., 2014). Primed hPSCs were dissociated into single cells  
3 with Accutase and 1.2 million cells per 10cm tissue culture dish were plated in primed hPSCs  
4 media with 10 $\mu$ M Y-27632 (Cell Guidance Systems) onto MEF seeded at a density of 4 million  
5 cells per 10cm dish. The following day, media was changed to 5i/LA comprising of a 1:1  
6 mixture of DMEM/F12 and Neurobasal, 1X N-2 supplement, 1X B-27 supplement, 1%  
7 nonessential amino acids, 2mM GlutaMAX, 50U/ml and 50 $\mu$ g/ml penicillin-streptomycin (all  
8 from ThermoFisher Scientific), 0.1mM  $\beta$ -mercaptoethanol (Millipore), 50 $\mu$ g/ml bovine serum  
9 albumin (ThermoFisher Scientific), 0.5% Knockout Serum Replacement (ThermoFisher  
10 Scientific), 20ng/ml recombinant human LIF, 20ng/ml ActivinA, 1 $\mu$ M PD0325901 (all from  
11 WT-MRC Cambridge Stem Cell Institute), 1 $\mu$ M IM-12, 1 $\mu$ M WH-4-023, 0.5 $\mu$ M SB590885  
12 and 10 $\mu$ M Y-27632 (all from Cell Guidance Systems). Cells were passaged with Accutase on  
13 days 5 and 10. Knockdown was induced by adding 1 $\mu$ g/ml Tetracycline (Sigma) dissolved in  
14 Embryo Transfer Water (Sigma) to the media.

15

## 16 **Immunofluorescence**

17 Cells were grown on glass coverslips coated with either Matrigel or Vitronectin XF and fixed  
18 with 4% PFA for 10min at RT, rinsed twice with PBS, and permeabilised for 20min at RT  
19 using PBS/0.25% Triton X-100 (Sigma). Cells were blocked for 30min at RT with blocking  
20 solution (PBS-0.25% Triton X-100 plus BSA 1%). Primary and secondary antibodies (listed in  
21 Table 1) were diluted in blocking solution and incubated for 1h at 37°C. Cells were washed  
22 twice with blocking solution after each antibody staining, and stained with DAPI for 5min at  
23 RT (0.1 $\mu$ g/ml DAPI in PBS-0.1% Triton). Finally, coverslips were mounted on slides using  
24 ProLong Gold antifade reagent (ThermoFisher Scientific) and imaged using an LSM 700  
25 confocal microscope (Zeiss). To image STB cells, cell aggregates were collected by gentle  
26 centrifugation (100 x g for 30sec) and fixed in 4% PFA for 20min. Cells were rinsed twice with  
27 PBS and resuspended in 100 $\mu$ l of PBS and dried overnight on plus-charged slides (SuperFrost  
28 Plus™ Adhesion slides, Fisher Scientific). The area containing the dried cells was circled with  
29 a PAP pen and the cells were permeabilised for 5min at RT with 100 $\mu$ l of 0.1% Triton-X100  
30 in PBS, and then blocked for 1h at RT with 100 $\mu$ l of 0.1% Triton-X100 plus 0.5% BSA.  
31 Primary antibodies (listed in Table 1) were diluted in blocking solution and incubated overnight  
32 at 4°C. Cells were washed three times with blocking solution for 5min, and stained with  
33 secondary antibodies for 1h at RT. Cells were then washed for 15min with PBS, followed by  
34 a second PBS wash supplemented with DAPI (0.1 $\mu$ g/ml) and a third with PBS. Finally,

1 coverslips were mounted using ProLong Gold antifade reagent (ThermoFisher Scientific) and  
2 imaged using an LSM 700 confocal microscope (Zeiss). Images processed using the software  
3 Fiji (ImageJ). At least four different fields from each experiment were imaged and  
4 representative ones are shown in the figures.

5

### 6 **Chromatin immunoprecipitation (ChIP) sequencing**

7 Chromatin immunoprecipitation (ChIP) was performed as previously described (Brown et al.,  
8 2011), using HEPES buffer containing 1% formaldehyde at room temperature, 10mM  
9 Dimethyl 3,3'-dithiopropionimidate dihydrochloride (DTBP, Sigma) and 2.5mM 3,3'-  
10 Dithiodipropionic acid di(N-hydroxysuccinimide ester) (DSP, Sigma) for the crosslinking step.  
11 Experiments were performed on biological duplicates, carried out at different times with cells  
12 from two different passages. 10µg of SMAD2/3 antibody (Table 1) was used per ChIP, and  
13 samples were purified using the iPure v2 bead kit (Diagenode). Libraries were constructed  
14 using the MicroPlex Library Preparation Kit v2 (Diagenode) following the manufacturer's  
15 instructions, 10ng of input and all of the ChIP DNA was used as the starting material. Libraries  
16 were quantified using KAPA Library Quantification Kit (Roche) following the manufacturer's  
17 instructions and by BioAnalyser. Sequencing was performed at the Babraham Institute's Next-  
18 Generation Sequencing Facility. Equimolar amounts of each library were pooled, and eight  
19 samples were multiplexed on one lane of a NextSeq500 HighOutput 75bp Single End run.

20

### 21 Data processing

22 Reads were quality and adapter trimmed using Trim Galore! (version 0.5.0\_dev, Cutadapt  
23 version 1.15), and aligned to GRCh38 using Bowtie 2 (version 2.3.2).

24

### 25 Data analysis

26 All analyses were performed using SeqMonk ([https://www.bioinformatics.  
27 babraham.ac.uk/projects/seqmonk/](https://www.bioinformatics.babraham.ac.uk/projects/seqmonk/), version 1.46.0) or R (<https://www.R-project.org/>, version  
28 4.0.2). For quantitation, read lengths were extended to 300 bp and regions of coverage outliers  
29 were excluded. SMAD2/3 peaks were called using a SeqMonk implementation of MACS  
30 (Zhang, et. al, 2008) with parameters  $p < 10E-6$ , sonicated fragment size = 300. Peaks were  
31 called individually for both replicates and the overlap of peaks used for annotation. Control  
32 regions were randomly selected from 700 bp tiles not overlapping excluded regions.

1 Differential binding analysis was performed using the R package Diffbind, and analysis  
2 of motifs that are relatively enriched in naïve compared to primed was performed using the  
3 MEME suit tool AME.

#### 4 5 **Single cell RNA-seq (10X Chromium Single Cell)**

6 H9 NK2 naïve and H9 primed hESCs were grown in presence of 20 $\mu$ M (naïve) and 10 $\mu$ M  
7 (primed) of SB431542 for 7 days. Cells during the time-course were collected at day 0 (control,  
8 no SB) and at day 1, 3, 5 and 7 of treatment and dissociated with Accutase (ThermoFisher  
9 Scientific) for 5min at 37°C in hypoxia (5% O<sub>2</sub>), and resuspended until single cell suspension  
10 was obtained. Accutase was blocked by adding PBS/BSA 0.5% with the respective media, and  
11 after a wash pellets were resuspended at a concentration of ~1,000 cells/ $\mu$ l in the respective  
12 media. 3,000 cells/sample were loaded on a Chromium Chip B Single Cell following the  
13 manufacturer's instruction to generate Gel Beads-in-emulsion (GEMs) using a Reagent kit v3.  
14 Final Chromium Single Cell 3' Gene Expression library was generated using standard Illumina  
15 paired-end constructs with P5 and P7 primers.

16  
17 Data analysis

18 Cell Ranger pipeline (version 3.0.2) was used to align reads to GRCh38 assembly and generate  
19 feature-barcode matrices for further gene expression analyses. Quality control, normalisation,  
20 dimensionality reduction analyses and all downstream analyses were carried out using the  
21 python-based library Scanpy (Wolf et al., 2018). Genes with read counts > 0 in at least 3 cells  
22 and cells expressing at least 200 genes were maintained for downstream analysis. Low quality  
23 cells were removed based on the percentage of unique molecular identifiers (UMIs) mapping  
24 to the mitochondrial genome and the number of genes detected. Logarithmic normalisation was  
25 performed, highly variable genes were selected, the total number of UMIs per cell was  
26 regressed out from log-normalised data and the regressed expression values were scaled. The  
27 dimensionality reduction was performed using Principal Component Analysis (PCA) and the  
28 neighborhood graph of cells was calculated using the PCA representation of the scaled data  
29 matrix. Clustering was performed on scaled data using the Louvain method. This graph was  
30 embedded in two dimensions using Uniform Manifold Approximation and Projection  
31 (UMAP).

32 Transcriptional similarity was also quantified at origin and region resolution by  
33 estimating the connectivity of data manifold partitions within the partition-based graph  
34 abstraction (PAGA) framework. Cluster markers and differentially expressed genes were

1 identified by applying the Wilcoxon-Rank-Sum test. In order to visualise the gradual variation  
2 in the transcriptional profile following the differentiation induced by the SB treatment, cells  
3 were represented as a pseudo-spatial dimension using the diffusion pseudotime method.

4 FPKM values for the ICM, EPI and TE/CTB single cell RNA-Seq datasets from (Xiang  
5 et al., 2020) (GSE136447) were extracted and log<sub>2</sub> transformed. Similarly, log<sub>2</sub> reads per 10k  
6 values from the first 200 cells from the A, D and E Louvain clusters were also prepared. For  
7 PCA analysis the data was filtered to retain only genes which were expressed in more than  
8 10% of cells in both datasets. PCA was used to separate the cells in the filtered Xiang et al.  
9 data, retaining the first and second principal components. The rotations from this analysis were  
10 then applied to the Louvain cluster data to project it into the same space (Figure 5e).

11 For overall correlation (Figure 5d and Supplementary Figure 5d) the mean log<sub>2</sub> FPKM  
12 for each condition from the Xiang et al. data was correlated with the summed, log<sub>2</sub> FPM values  
13 from the Louvain clusters using Pearson's correlation. Only genes with log<sub>2</sub> FPKM > 0.2 in  
14 any Xiang et al. dataset and raw counts > 2 in any Louvain cluster were used for the calculation.

15 For the single cell heatmaps (Figure 5f) a Wilcoxon Rank Sum test was used to identify  
16 marker genes which were significantly (fdr < 0.05, Benjamini-Hochberg correction) enriched  
17 in one Xiang et al. scRNA-seq condition relative to the others. We then plotted a heatmap of  
18 the expression patterns of the marker genes (columns) in each cell (rows) for both the Xiang et  
19 al. and Louvain cluster data, with the cells being ordered by the group to which they belonged.  
20 Measures were per-gene z-score normalised log<sub>2</sub> FPM.

21

## 22 **Data availability**

23 Sequence data that support the findings of this study have been deposited in ArrayExpress with  
24 the accession numbers E-MTAB-10017 (ChIP-seq) and E-MTAB-10018 (scRNA-seq). Source  
25 data files have been provided for Figure 3.

1    **Acknowledgements**

2    We thank Kristina Tabbada and Clare Murnane of the Babraham Institute Next Generation  
3    Sequencing Facility, and Felix Krueger from Babraham Bioinformatics for sequencing QC and  
4    mapping. We also thank Steven Leonard of the Wellcome Sanger Institute for pre-processing  
5    single cell RNA-seq data. We are very grateful to Vicente Perez-Garcia (Babraham Institute  
6    and the Centre for Trophoblast Research) for providing advice and reagents for characterising  
7    the naïve-derived human trophoblast cells. Work in our laboratories is supported by grants  
8    from the BBSRC (BBS/E/B/000C0421, BBS/E/B/000C0422) and the MRC (MR/T011769/1).  
9    A.J.C. was supported by an MRC DTG Studentship (MR/J003808/1). This work was also  
10   supported by the European Research Council Grant New-Chol (L.V., A.O.), the Cambridge  
11   Hospitals National Institute for Health Research Biomedical Research Center (L.V., S.B.), the  
12   EU H2020 INTENS grant (D.O.), Gates Cambridge PhD studentship (B.T.W.), JSPS Overseas  
13   Research Fellowship (201860446) and a Grant-in-Aid (16J08005) (S.N.), and core support  
14   grant from the Wellcome and Medical Research Council to the Wellcome – Medical Research  
15   Council Cambridge Stem Cell Institute.

16

17   **Competing interests**

18   The authors declare no competing interests.

Figure 1

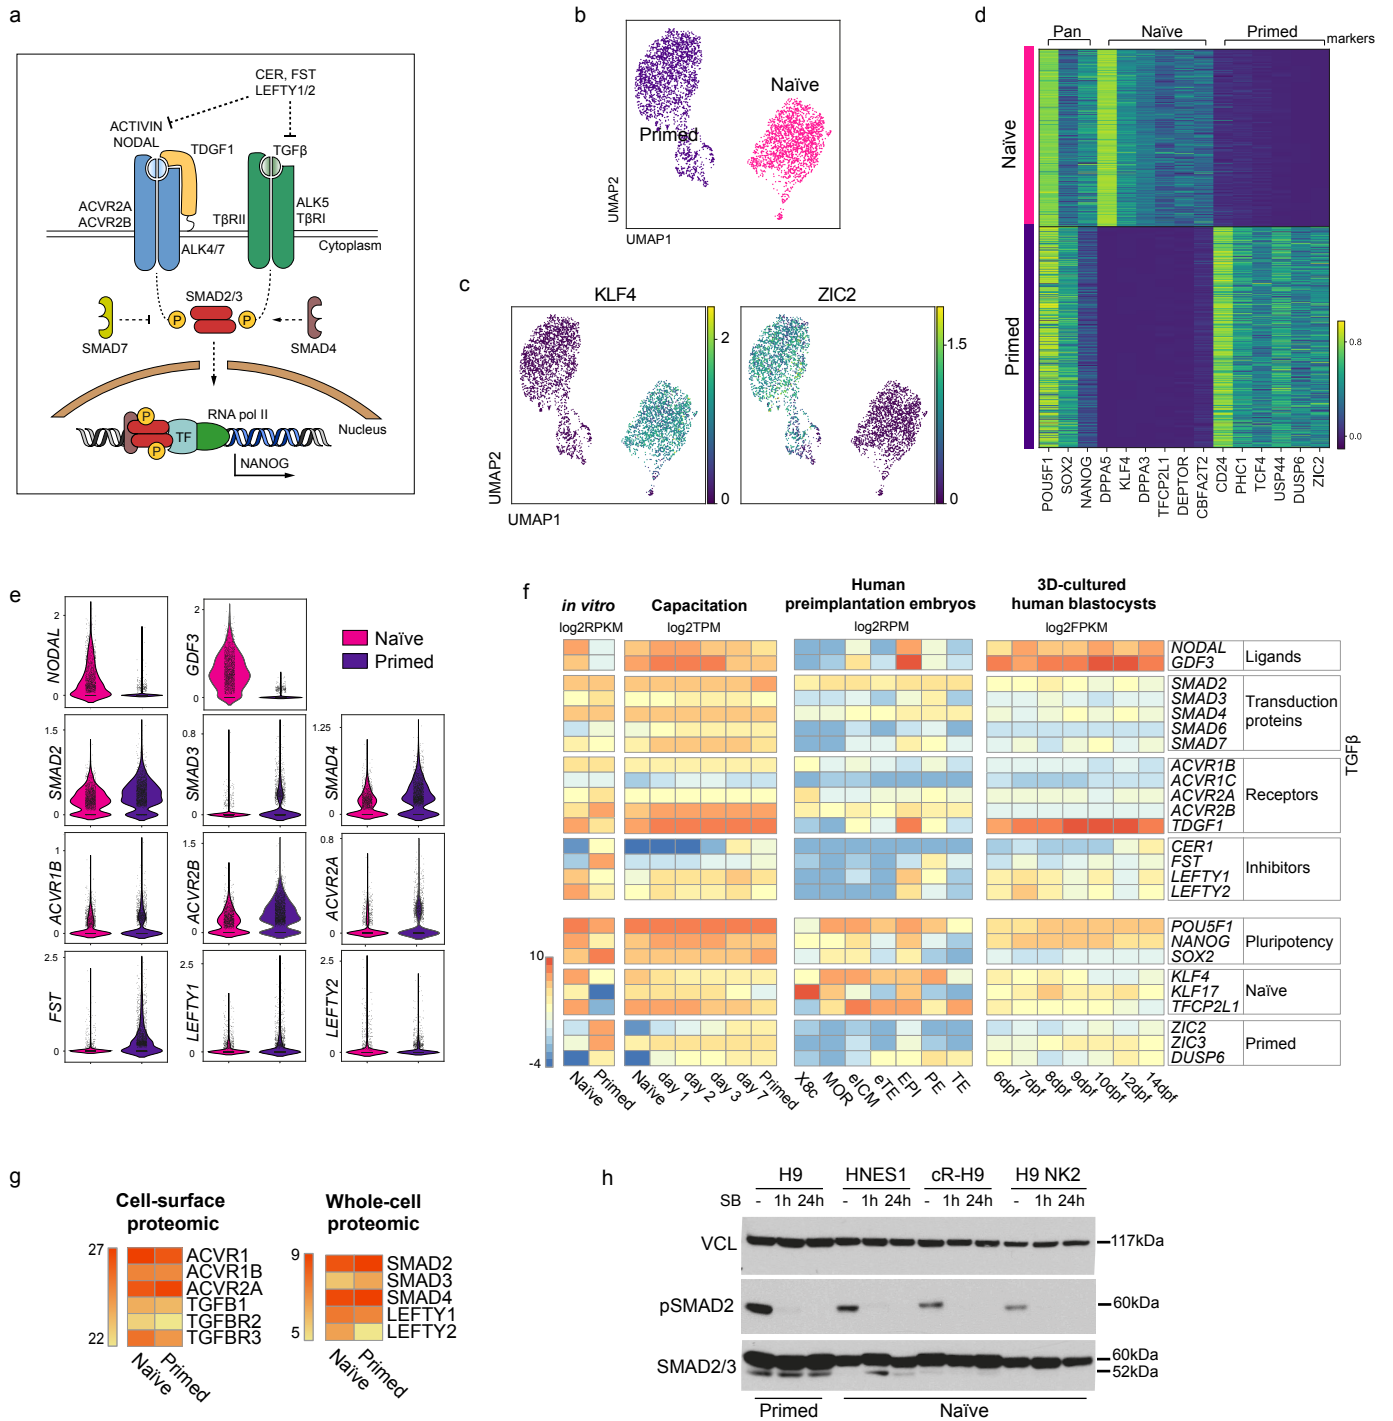

1 **Figure 1. TGF $\beta$  signalling pathway is active in human naïve pluripotent stem cells**

- 2 a) Overview of the TGF $\beta$  signalling pathway. Extracellular ligands ACTIVIN and NODAL  
3 bind to type I (ACVR2A/2B) and type II transmembrane receptors (ALK4/7), and TGF $\beta$  binds  
4 to T $\beta$ RI and T $\beta$ RII/ALK5. NODAL requires the additional transmembrane co-receptor TDGF1  
5 (CRIPTO1). The activated receptor complex phosphorylates the linker region of SMAD2 and  
6 SMAD3, which enter the nucleus in complex with SMAD4. They act as transcriptional  
7 regulators and induce or repress the transcription of their target loci by recruiting other  
8 transcription factors (TF) and epigenetic modifiers. Several negative regulators of the  
9 signalling pathway are also shown: LEFTY1/2 block the signalling pathway by binding to the  
10 receptors; Cerberus (CER) and Follistatin (FST) block the ligands; SMAD7 inhibits the  
11 SMAD2/3 complex.
- 12 b) 10X RNA-seq data of naïve and primed hPSCs represented on a UMAP plot.
- 13 c) UMAP visualisation of naïve and primed hPSCs reporting the relative expression of  
14 respective pluripotent state markers, *KLF4* and *ZIC2*.
- 15 d) Heatmap reporting the expression values of selected naïve and primed marker genes divided  
16 in pan-pluripotency markers, and naïve- and primed-specific markers within the top 250  
17 differentially expressed genes.
- 18 e) Violin plots of the 10X RNA-seq data comparing the transcript expression of TGF $\beta$  effectors  
19 in naïve and primed hPSCs.
- 20 f) Heatmap summarising the transcript expression of TGF $\beta$  effectors and pluripotency genes.  
21 RNA-seq datasets shown are: *in vitro*-cultured naïve and primed hPSCs (Collier et al., 2017),  
22 hPSCs undergoing naïve to primed state capacitation (Rostovskaya et al., 2019), human pre-  
23 implantation embryos (Petropoulos et al., 2016), and epiblast cells within a 3D human  
24 blastocyst culture system (Xiang et al., 2020). X8c: 8-cell stage; MOR: morula; eICM: early-  
25 ICM; eTE: early-trophectoderm; EPI: epiblast; PE: primitive endoderm; TE: trophectoderm.  
26 Dpf: days post-fertilisation.
- 27 g) Heatmaps summarising protein abundance levels determined by cell-surface proteomics  
28 (Wojdyla et al., 2020) and whole cell proteomics (Di Stefano et al., 2018) for TGF $\beta$  effectors  
29 in naïve and primed hPSCs.
- 30 h) Western blot analysis of TGF $\beta$  signalling pathway activation in H9 primed hPSCs (cultured  
31 in E8 medium) and in three naïve hPSC lines cultured in t2iLGö medium: embryo-derived  
32 HNES1, chemically-reset cR-H9, and transgene-reset H9 NK2. Blots show SMAD2  
33 phosphorylation signal (pSMAD2-Ser465/Ser467) and total SMAD2/3 levels in normal

- 1 conditions (-), and following 1h and 24h of SB431542 supplementation to their culture media.
- 2 Vinculin (VCL) used as a loading control.



Figure 2

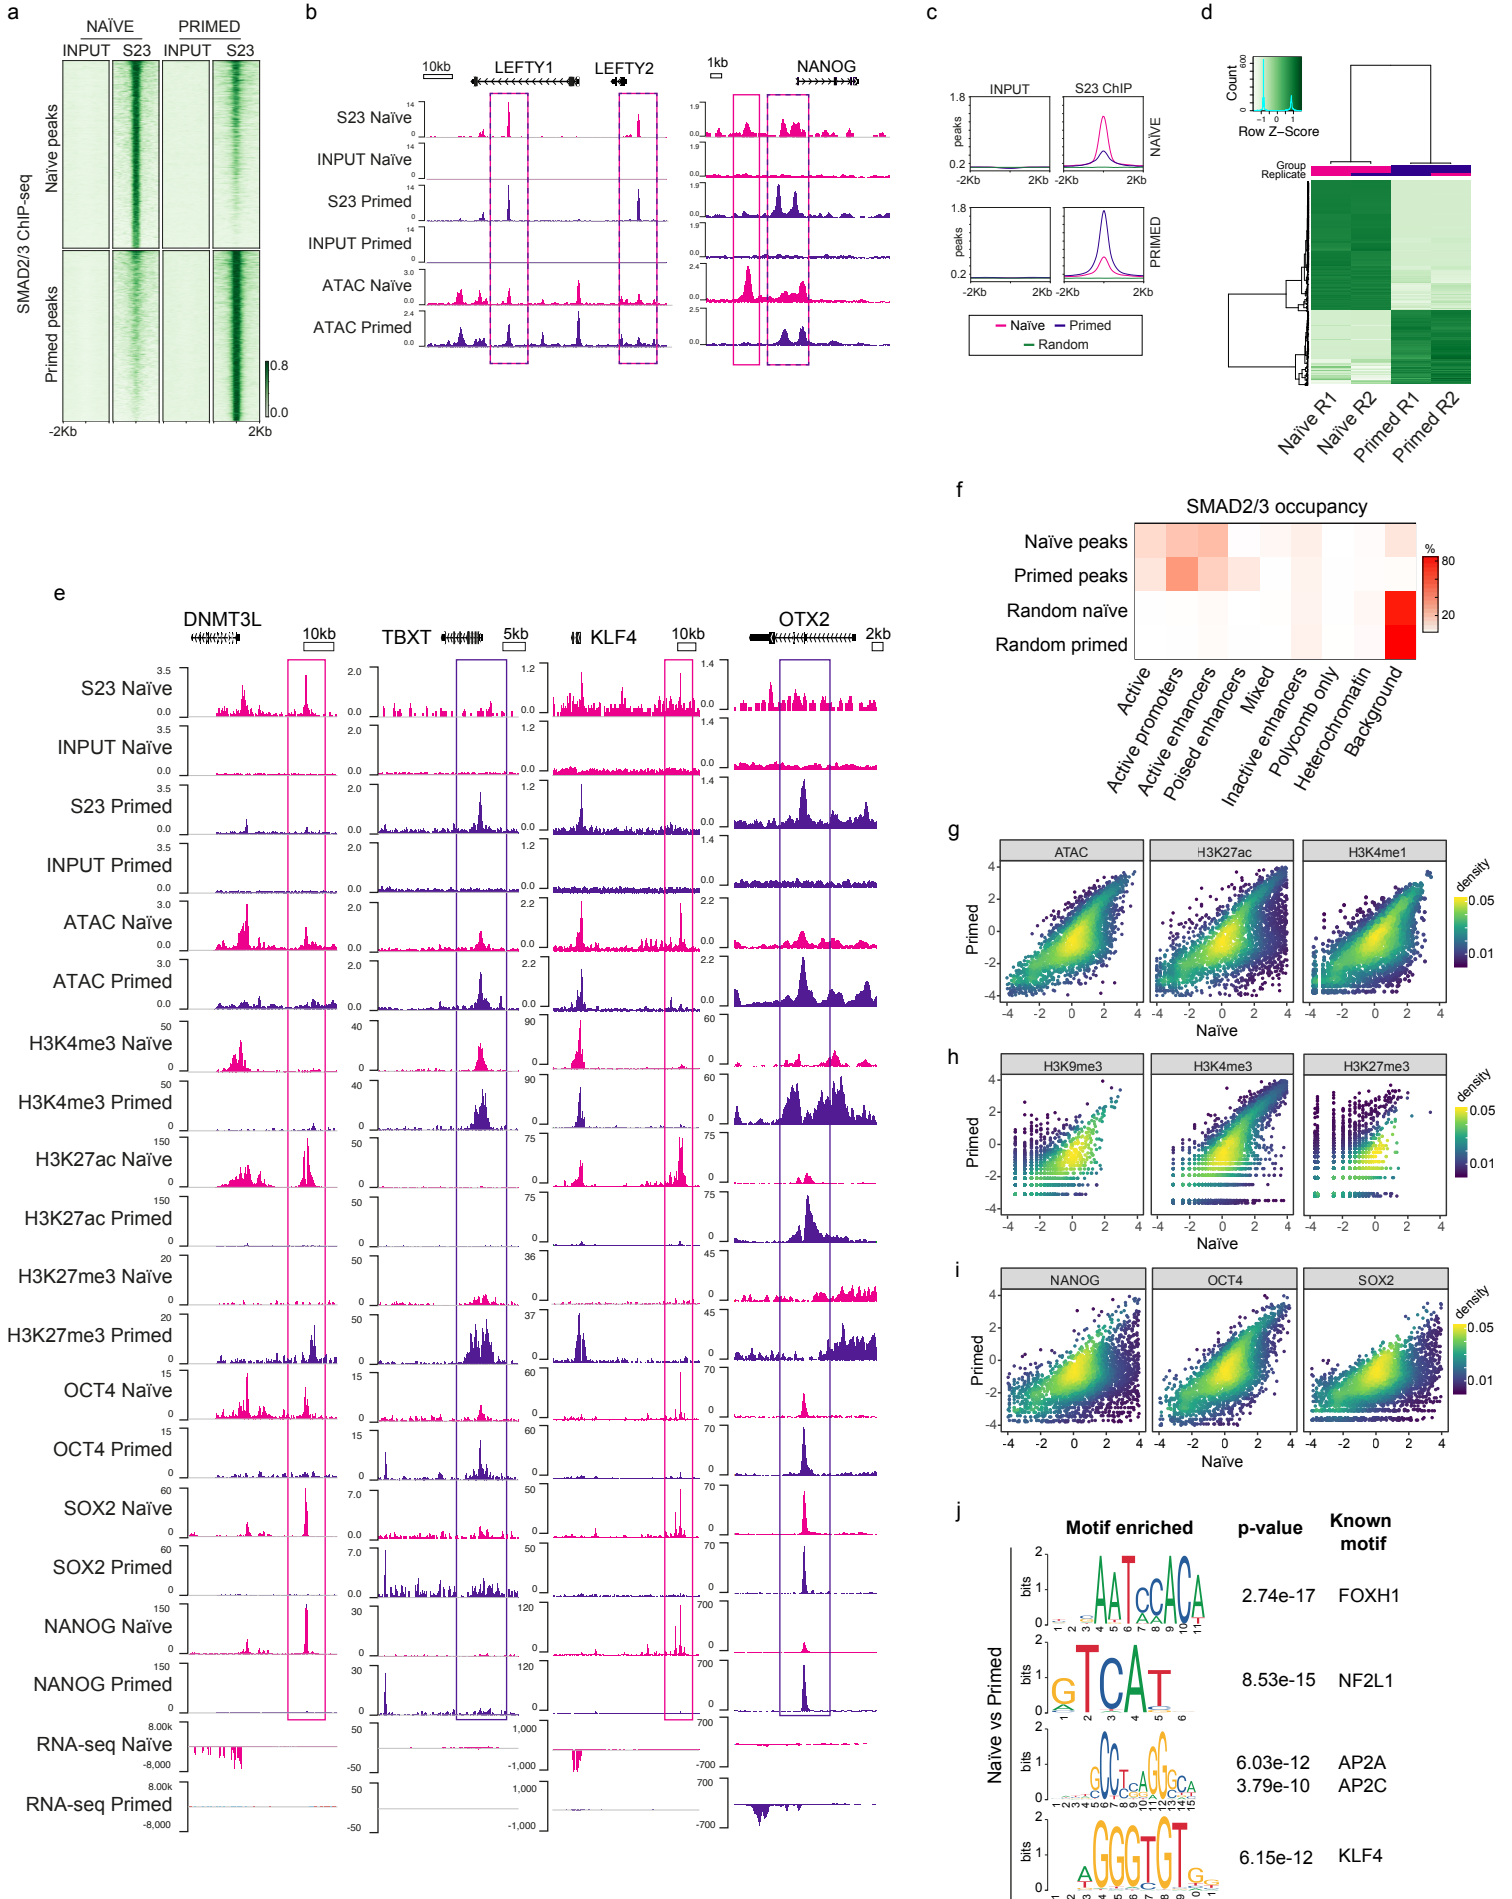

- 1 **Figure 2. SMAD2/3 binds to chromatin at common and pluripotent state-specific sites**
- 2 a) Heatmap displaying normalised SMAD2/3 (S23) ChIP-seq reads  $\pm 2\text{kb}$  from the centre of
- 3 SMAD2/3-bound peaks that were independently defined in naïve (H9 NK2 line cultured in
- 4 t2iLGö medium) and primed (H9 line cultured in E8 medium) hPSCs; two biological replicates
- 5 per cell line. Top panel shows the regions identified as SMAD2/3-bound peaks in naïve cells;
- 6 lower panel shows SMAD2/3-bound peaks in primed cells.
- 7 b) Genome browser tracks reporting SMAD2/3 (S23) binding (this study) and chromatin
- 8 accessibility (ATAC-seq; Pastor et al., 2018) at the *LEFTY1/2* and *NANOG* loci in naïve and
- 9 primed hPSCs. Input tracks are shown as controls.
- 10 c) Normalised average meta-plots of SMAD2/3 (S23) ChIP signal  $\pm 2\text{kb}$  from the centre of the
- 11 peaks in naïve and primed hPSCs, compared to a randomly-selected subset of regions.
- 12 d) Heatmap displaying regions that are differentially bound by SMAD2/3 in naïve and primed
- 13 hPSCs in two biological replicates (R1 and R2).
- 14 e) Genome browser tracks reporting expression (RNA-seq), chromatin accessibility (ATAC-
- 15 seq), and ChIP-seq datasets of SMAD2/3 (S23), histone marks for enhancers (H3K27ac) and
- 16 promoters (H3K4me3, H3K27me3), and transcription factors (OCT4, SOX2, NANOG) at the
- 17 *DNMT3L*, *TBXT*, *KLF4*, *OTX2* loci. Input tracks are shown as controls. The following data sets
- 18 are shown: ATAC-seq (Pastor et al., 2018); H3K4me3 (Theunissen et al., 2014); H3K4me1
- 19 (Chovanec et al., 2021; Gifford et al., 2013); H3K27me3 (Theunissen et al., 2014); H3K27ac
- 20 (Ji et al., 2016); OCT4 (Ji et al., 2016); SOX2 (Chovanec et al., 2021); NANOG (Chovanec et
- 21 al., 2021; Gifford et al., 2013) and RNA-seq (Takashima et al., 2014).
- 22 f) Heatmap showing the frequency of SMAD2/3 peak centre locations with respect to
- 23 ChromHMM states in naïve and primed hPSCs (Chovanec et al., 2021). SMAD2/3 peaks in
- 24 naïve and primed hPSCs were annotated with their respective ChromHMM states. The
- 25 annotations associated with the randomly-selected control regions reflect the overall genomic
- 26 representation of chromatin states.
- 27 g-i) Density coloured scatter plots showing indicated ChIP-seq and ATAC-seq values ( $\log_2$
- 28 RPM) in naïve versus primed hPSCs. Each dot corresponds to one naïve-specific SMAD2/3
- 29 peak.
- 30 j) Differential motif enrichment reporting the top four motifs (ranked by p-value) at SMAD2/3
- 31 binding sites in naïve hPSCs that are enriched compared to motifs identified at SMAD2/3
- 32 binding sites in primed hPSCs.

Figure 3

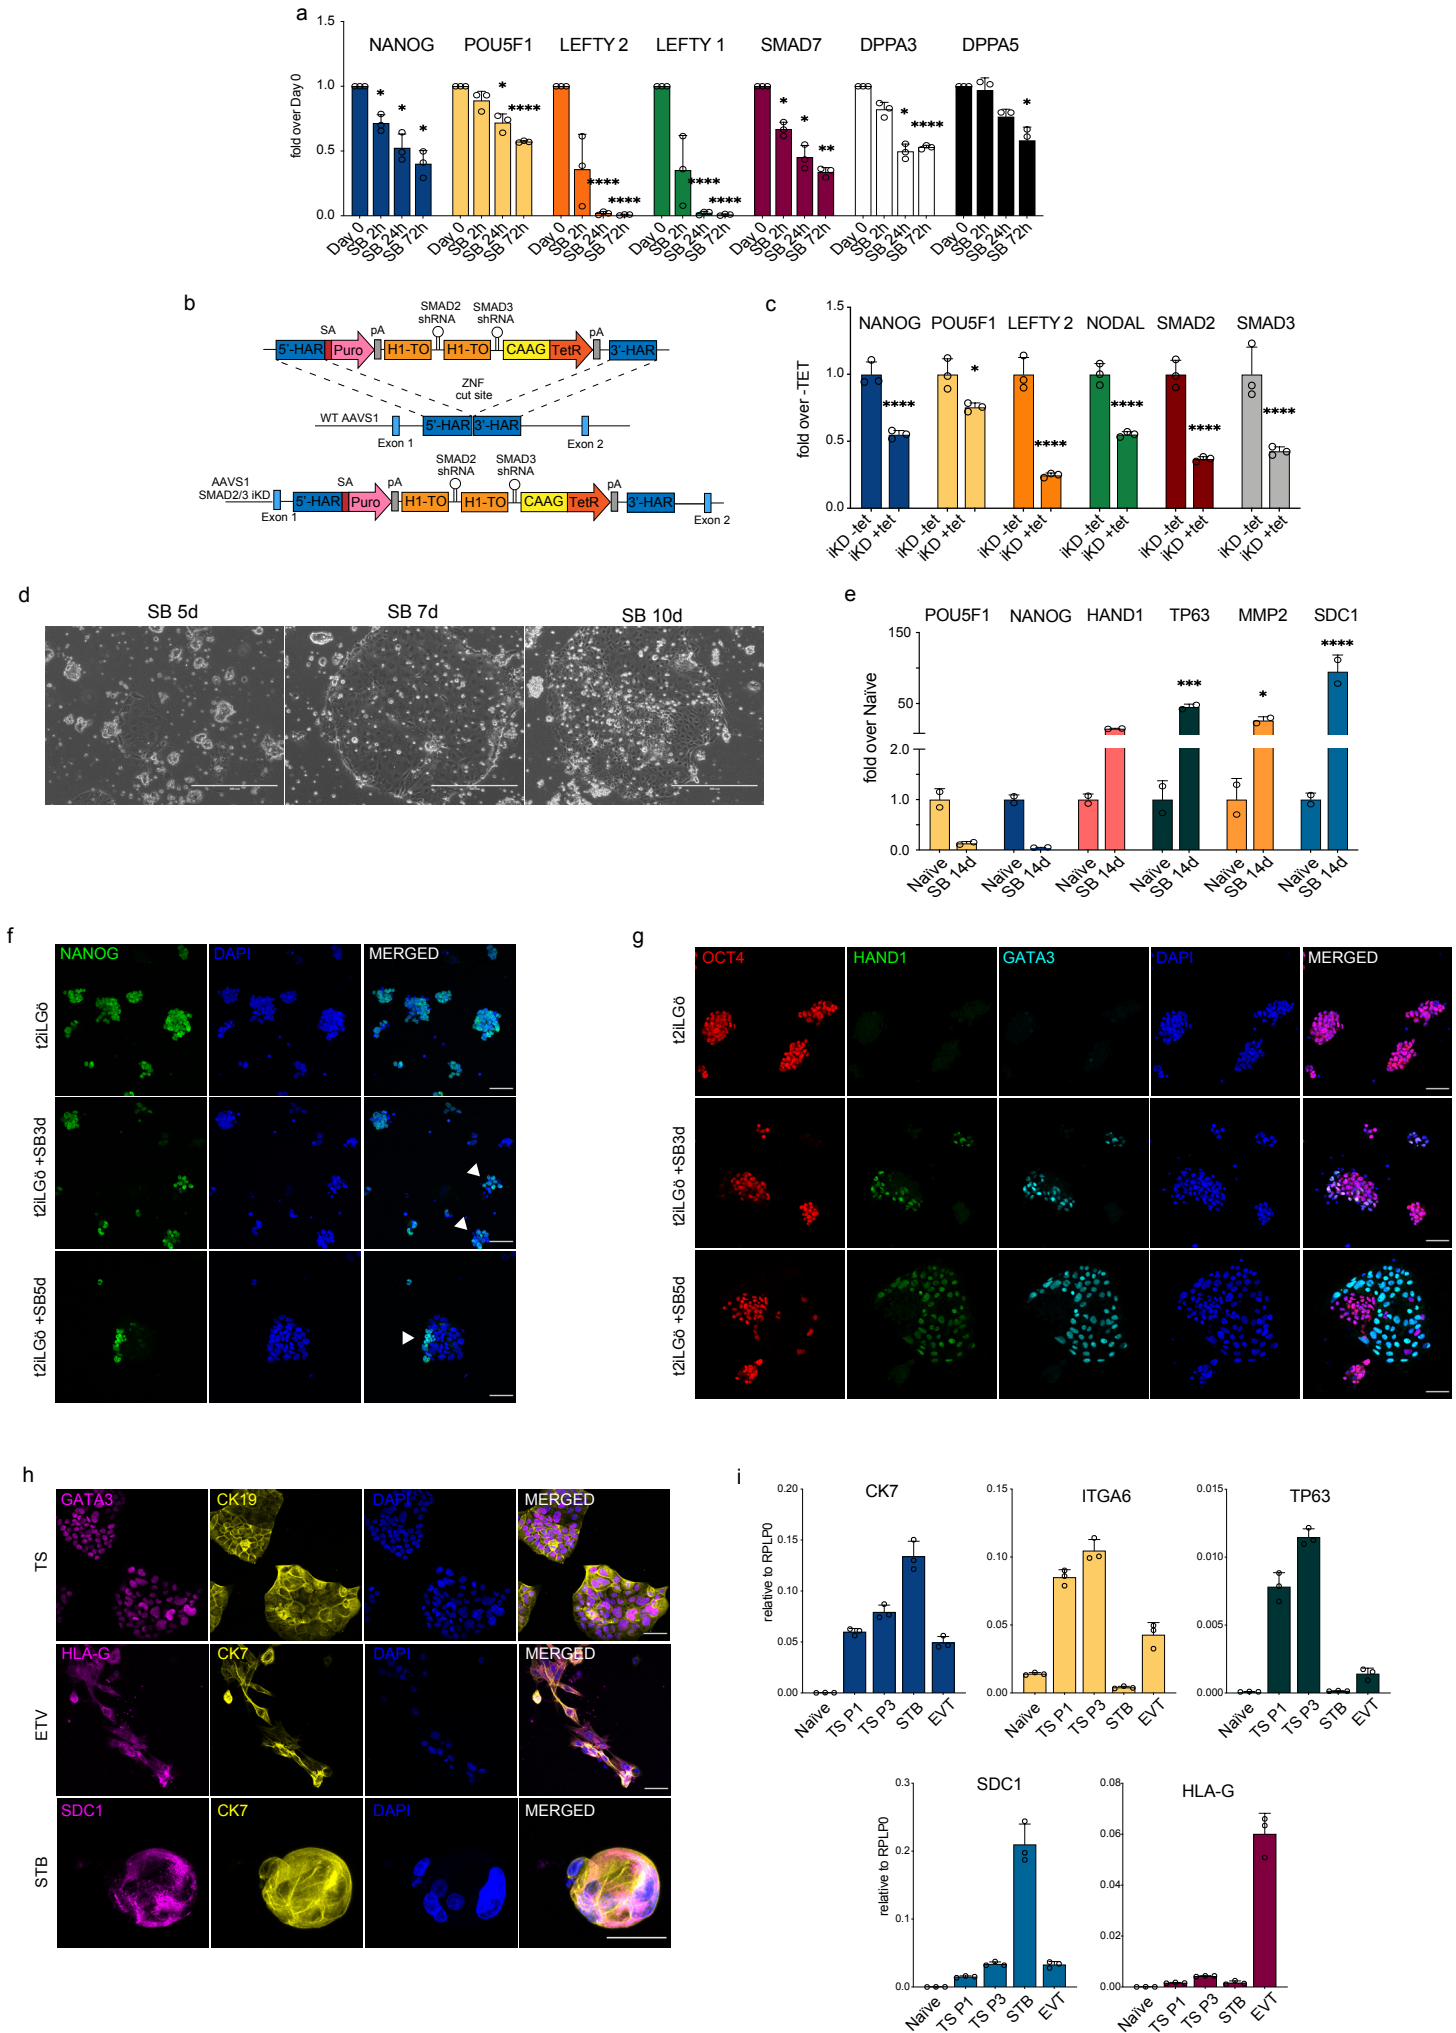

1 **Figure 3. Inhibiting TGF $\beta$  signalling induces loss of pluripotency in naïve hPSCs**

- 2 a) RT-qPCR expression analysis of pluripotency-associated genes and TGF $\beta$ -associated genes  
3 in naïve hPSCs (H9 NK2 line) following SB431542 treatment (t2iLGö + SB). Expression  
4 levels are shown as fold changes relative to day 0.
- 5 b) Schematic showing the integration of a single-step optimised inducible knock-down  
6 targeting construct into the *A/VSI* locus of H9 hPSCs, enabling the expression of SMAD2 and  
7 SMAD3 short hairpin RNAs (shRNAs) under the control of a tetracycline inducible promoter.  
8 ZFN: zinc-finger nucleases; 5'-HAR/3'-HAR: upstream/downstream homology arm; H1-TO:  
9 Tetracycline-inducible H1 Pol III promoter carrying one tet operon after the TATA box;  
10 CAAG: CMV early enhancer, chicken  $\beta$ -actin and rabbit  $\beta$ -globin hybrid promoter; TetR:  
11 Tetracycline-sensitive repressor protein; SA: splice acceptor; Puro, Puromycin resistance; pA,  
12 polyadenylation signal. Schematic adapted from (Bertero et al., 2016).
- 13 c) RT-qPCR analysis of gene expression levels in SMAD2/3 inducible knock-down (iKD) H9  
14 naïve hPSCs following 5 days of tetracycline (tet) treatment. Expression levels are shown for  
15 each gene as fold change relative to iKD -tet. Cells were cultured in t2iLGö medium.
- 16 d) Phase contrast pictures of H9 NK2 naïve hPSCs after 5, 7, and 10 days of SB treatment in  
17 t2iLGö medium. Scale bars: 400  $\mu$ m.
- 18 e) RT-qPCR analysis of trophoblast (*HAND1*, *TP63*, *MMP2* and *SDC1*) and pluripotency  
19 (*POU5F1*, *NANOG*) gene expression levels in naïve hPSCs following long term (14 days) SB  
20 treatment in t2iLGö medium. Expression levels are shown as fold changes relative to day 0  
21 samples, n = 2 biological replicates.
- 22 f) Immunofluorescence microscopy showing the downregulation of NANOG (green) in naïve  
23 hPSCs following 3 and 5 days of SB treatment. DAPI signal in blue. White arrowheads indicate  
24 colonies displaying heterogeneous expression of NANOG. Scale bars: 50  $\mu$ m.
- 25 g) Immunofluorescence microscopy for OCT4 (red), HAND1 (green), GATA3 (cyan) and  
26 DAPI (blue) in naïve hPSCs following 3 and 5 days of SB treatment in t2iLGö medium. Scale  
27 bars: 50  $\mu$ m.
- 28 h) Immunofluorescence microscopy for GATA3, HLA-G, SDC1 (magenta), CK19 and CK7  
29 (yellow), and DAPI (blue) in naïve-derived trophoblast stem cells (TS), extravillous  
30 trophoblast (ETV) and syncytiotrophoblast (STB). Scale bars: 50  $\mu$ m.
- 31 i) RT-qPCR analysis of gene expression levels in naïve-derived trophoblast stem cells (TS),  
32 extravillous trophoblast (ETV) and syncytiotrophoblast (STB) compared to undifferentiated  
33 naïve hPSCs. Expression levels are shown for each gene relative to the housekeeping gene  
34 *RPLP0*.

- 1 RT-qPCR data show the mean  $\pm$  SD of three biological replicates (unless specified otherwise)
- 2 and were compared to their relative control using an ANOVA with Tukey's or Šídák's multiple
- 3 comparisons test (\* $p \leq 0.05$ , \*\* $p \leq 0.01$ , \*\*\* $p \leq 0.001$ , \*\*\*\* $p \leq 0.0001$ ). See also Figure 3–
- 4 Source Data 1.

Figure 4

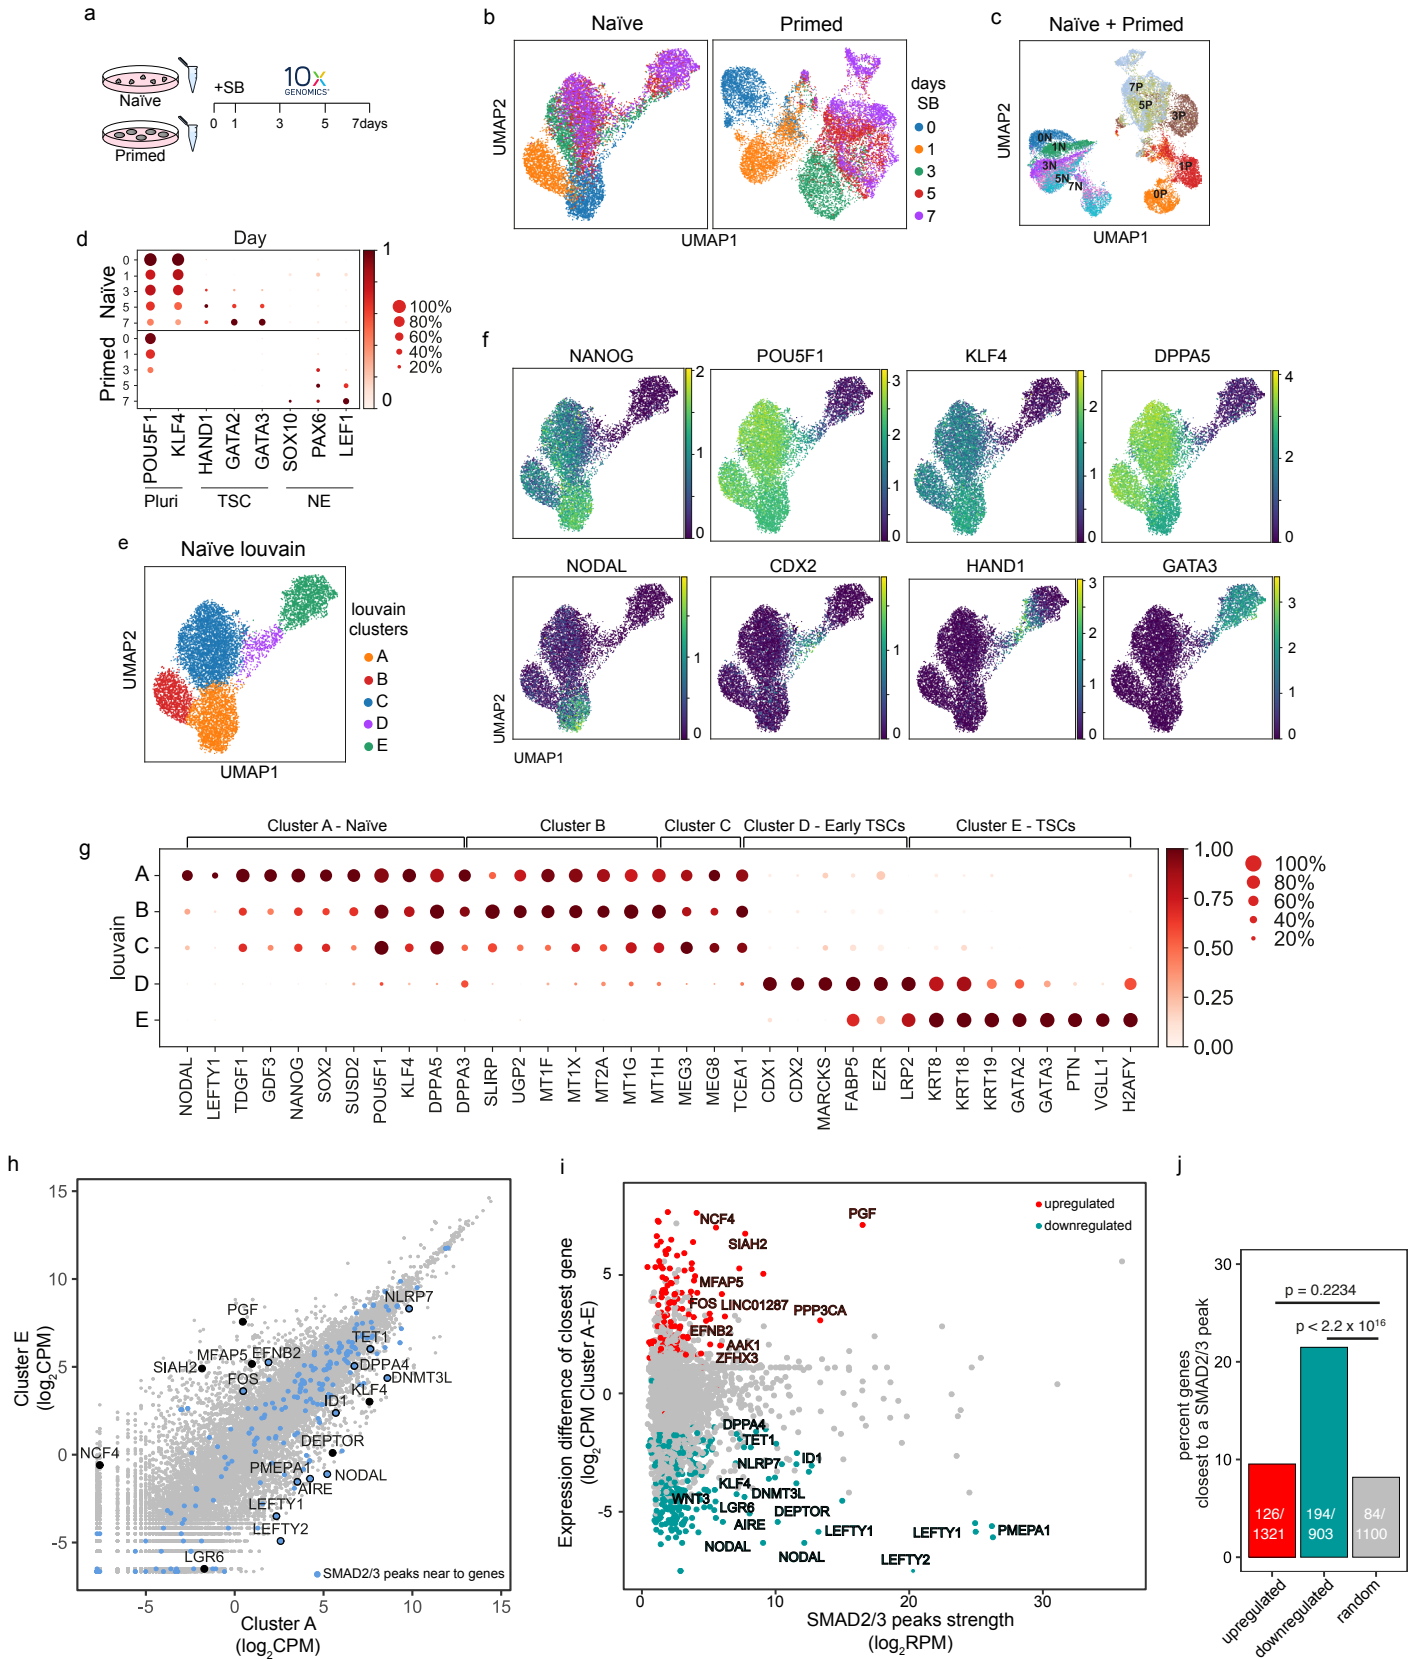



1 **Figure 4. Single-cell transcriptional analysis reveals a trophoblast-like population arising**  
2 **in response to TGF $\beta$  inhibition in naïve hPSCs**

- 3 a) Overview of the experimental procedure. Naïve and primed hPSCs were cultured in the  
4 presence of SB-431542 (SB), a potent TGF $\beta$  inhibitor, and samples were collected at days 0,  
5 1, 3, 5 and 7. Single cell transcriptomes were obtained by 10X sequencing.
- 6 b) UMAP visualisation of naïve and primed cells during the SB time-course experiment,  
7 separated by days of treatment.
- 8 c) UMAP visualisation of the combined naïve and primed data set, separated by days of SB  
9 treatment (indicated by the number in the labels). N, naïve; P, primed.
- 10 d) Dot plot of selected gene expression values in naïve and primed cells during the SB time-  
11 course experiment, plotted by days of treatment (in rows). Each dot represents two values:  
12 mean expression within each category (visualised by colour) and fraction of cells expressing  
13 the gene (visualised by the size of the dot). Genes are indicative of pluripotent cells (Pluri),  
14 trophoblast stem cells (TSC) and neuroectoderm cells (NE).
- 15 e) UMAP visualisation of naïve hPSCs during the SB time-course experiment, separated by  
16 Louvain clustering (five clusters, A to E).
- 17 f) UMAP visualisation of naïve cells during the SB time-course experiment, showing the  
18 relative expression of pluripotency markers, *NANOG*, *POU5F1*, *KLF4*, and *DPPA5*; TGF $\beta$   
19 effectors, *NODAL*; and trophoblast markers, *CDX2*, *HAND1*, *GATA3*.
- 20 g) Dot plot of expression values in naïve cells during the SB time-course experiment, separated  
21 by the five Louvain clusters. The genes shown represent a subset of the top 25 differentially  
22 expressed genes between the five clusters, as reported in Figure supplement 5e. Each dot  
23 represents two values: mean expression within each category (visualised by colour) and  
24 fraction of cells expressing the gene (visualised by the size of the dot).
- 25 h) Scatter plot reporting pseudobulk RNA-seq values (from 10X data) for cells in Louvain  
26 clusters A and E. Each dot represents one gene. Genes that have SMAD2/3 ChIP-seq peaks  
27 ( $\log_2$  RPM > 5) within 12 kb of their transcription start site (TSS) are highlighted in blue and  
28 annotated. Several differentially expressed genes that are the closest gene to a SMAD2/3 peak  
29 (but are further away than 12 kb) are also named.
- 30 i) Scatter plot showing SMAD2/3 ChIP-seq peak strength ( $\log_2$  RPM) versus the expression  
31 difference (cluster A – cluster E;  $\log_2$  CPM) of the gene nearest to the SMAD2/3 peak.  
32 Upregulated genes, red; downregulated genes, green.
- 33 j) SMAD2/3 peaks were annotated with their nearest genes. Bar plot showing the percentage  
34 of genes that are the closest gene to a SMAD2/3 peak for genes that are upregulated (red) or

1 downregulated (green) between cells in clusters A and E. A randomly-selected set of control  
2 genes are shown in grey. The number of closest genes and the set size are reported within the  
3 bars. Statistical testing was performed using Chi-square test with Yates continuity and  
4 Bonferroni multiple testing correction.



Figure 5

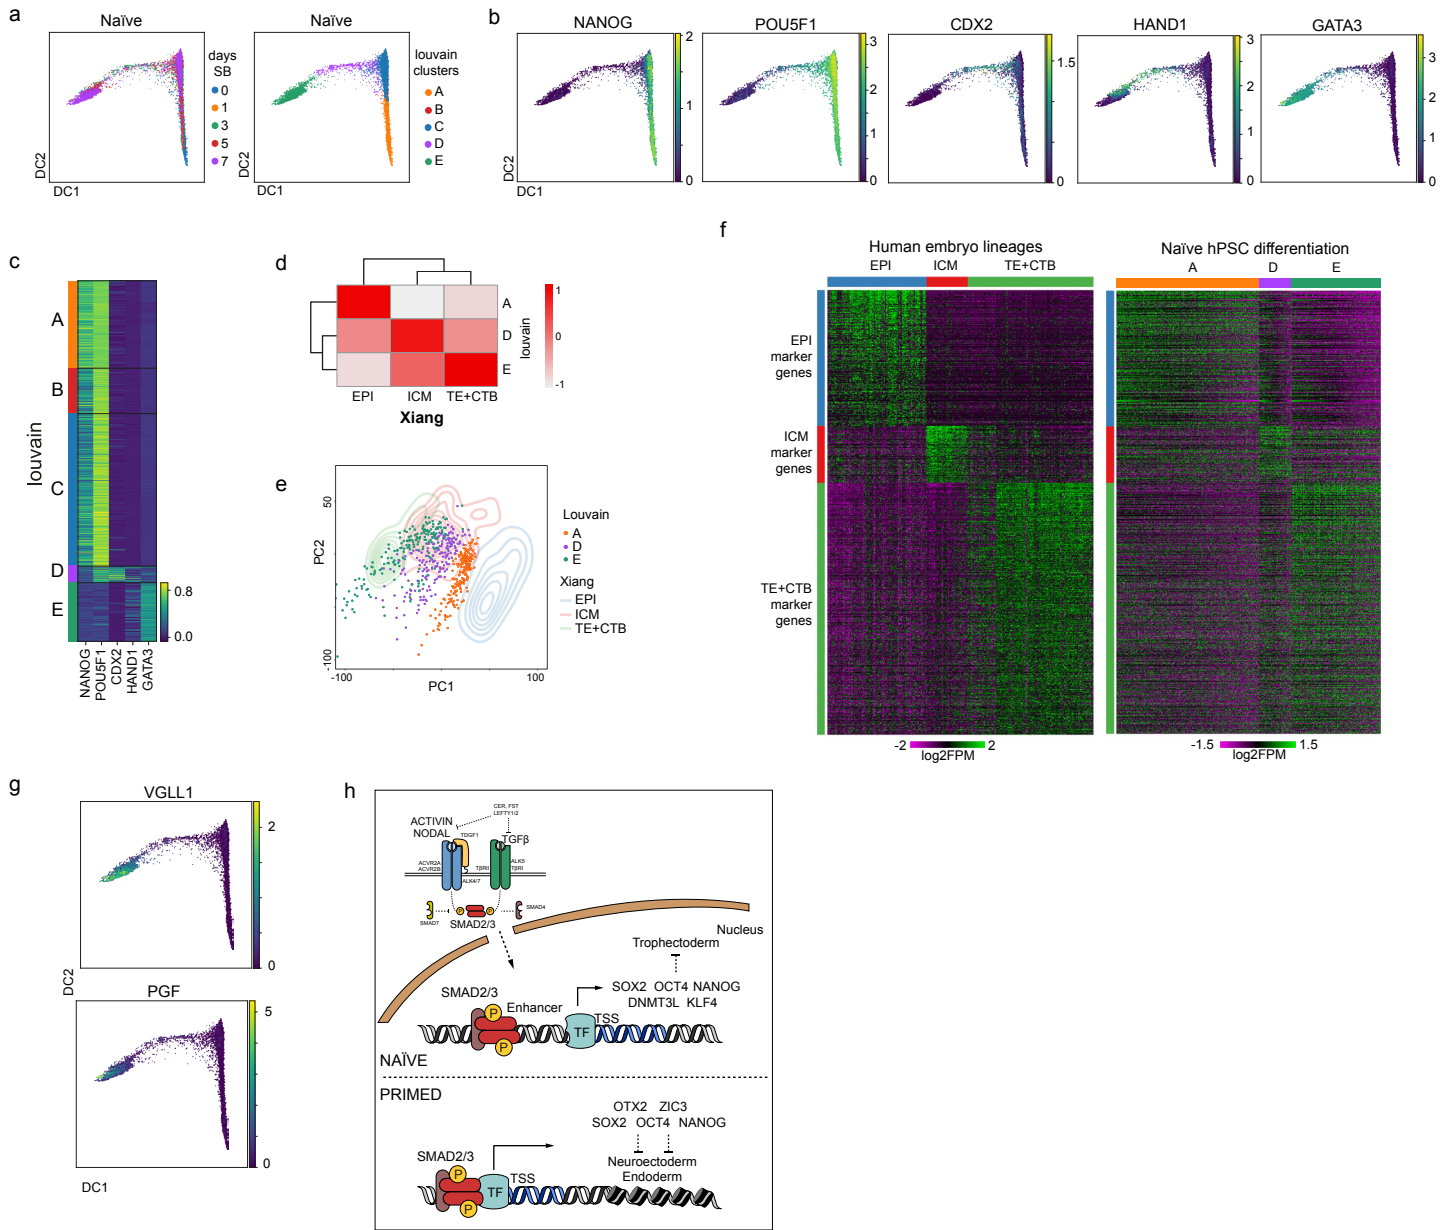

1 **Figure 5. Differentiation of TGF $\beta$ -inhibited naïve hPSCs transcriptionally recapitulates**  
2 **early trophoderm specification in human embryos**

3 a) Diffusion maps of naïve cells during the SB time-course experiment, separated by days of  
4 treatment (left) and Louvain clustering (right).

5 b) Overlay of the diffusion maps with the relative expression of pluripotency markers *NANOG*,  
6 and *POU5F1*, and trophoblast markers *CDX2*, *HAND1*, *GATA3*.

7 c) Heatmap of the expression values of genes reported in Figure 5b separated by the Louvain  
8 clusters. Note the overlap in the expression of pluripotency and trophoblast markers in cells  
9 within cluster D.

10 d) Correlation plot between pseudobulk data from Louvain clusters A/D/E and EPI (Epiblast),  
11 ICM (Inner Cell Mass), and TE+CTB (Trophoderm+Cytotrophoblast) from cultured human  
12 pre-gastrulation embryos (Xiang et al., 2020).

13 e) PCA plot overlapping 200 randomly-selected cells from each of the Louvain clusters A/D/E  
14 (individual dots) and data from 3D-cultured human pre-gastrulation embryos (Xiang et al.,  
15 2020), based on EPI, ICM and TE+CTB cells (contour lines). PC1 variance 2.15, PC2 variance  
16 1.41.

17 f) Heatmaps visualising the expression of genes in EPI, ICM and TE+CTB (Xiang et al., 2020)  
18 and cells in Louvain clusters A/D/E. Note that the genes are in the same order for both plots.

19 g) Diffusion maps of naïve cells during the SB time-course experiment showing the relative  
20 expression of CTB markers – *VGLL1* and *PGF*.

21 h) We propose there is a continuum of TGF $\beta$ /Activin/Nodal signalling that spans a  
22 developmental window of human pluripotent states from naïve to primed. In both states, active  
23 TGF $\beta$  signalling promotes the expression of common pluripotency genes, such as *NANOG* and  
24 *POU5F1*, and contributes to the maintenance of pluripotency. SMAD2/3 are additionally  
25 required in naïve hPSCs to sustain the expression of naïve pluripotency factors, including *KLF4*  
26 and *DNMT3L*. Inactivating TGF $\beta$  signalling in naïve hPSCs leads to the downregulation of  
27 pluripotency genes, thereby enabling the induction of trophoblast differentiation.

## Supplemental Figure 1

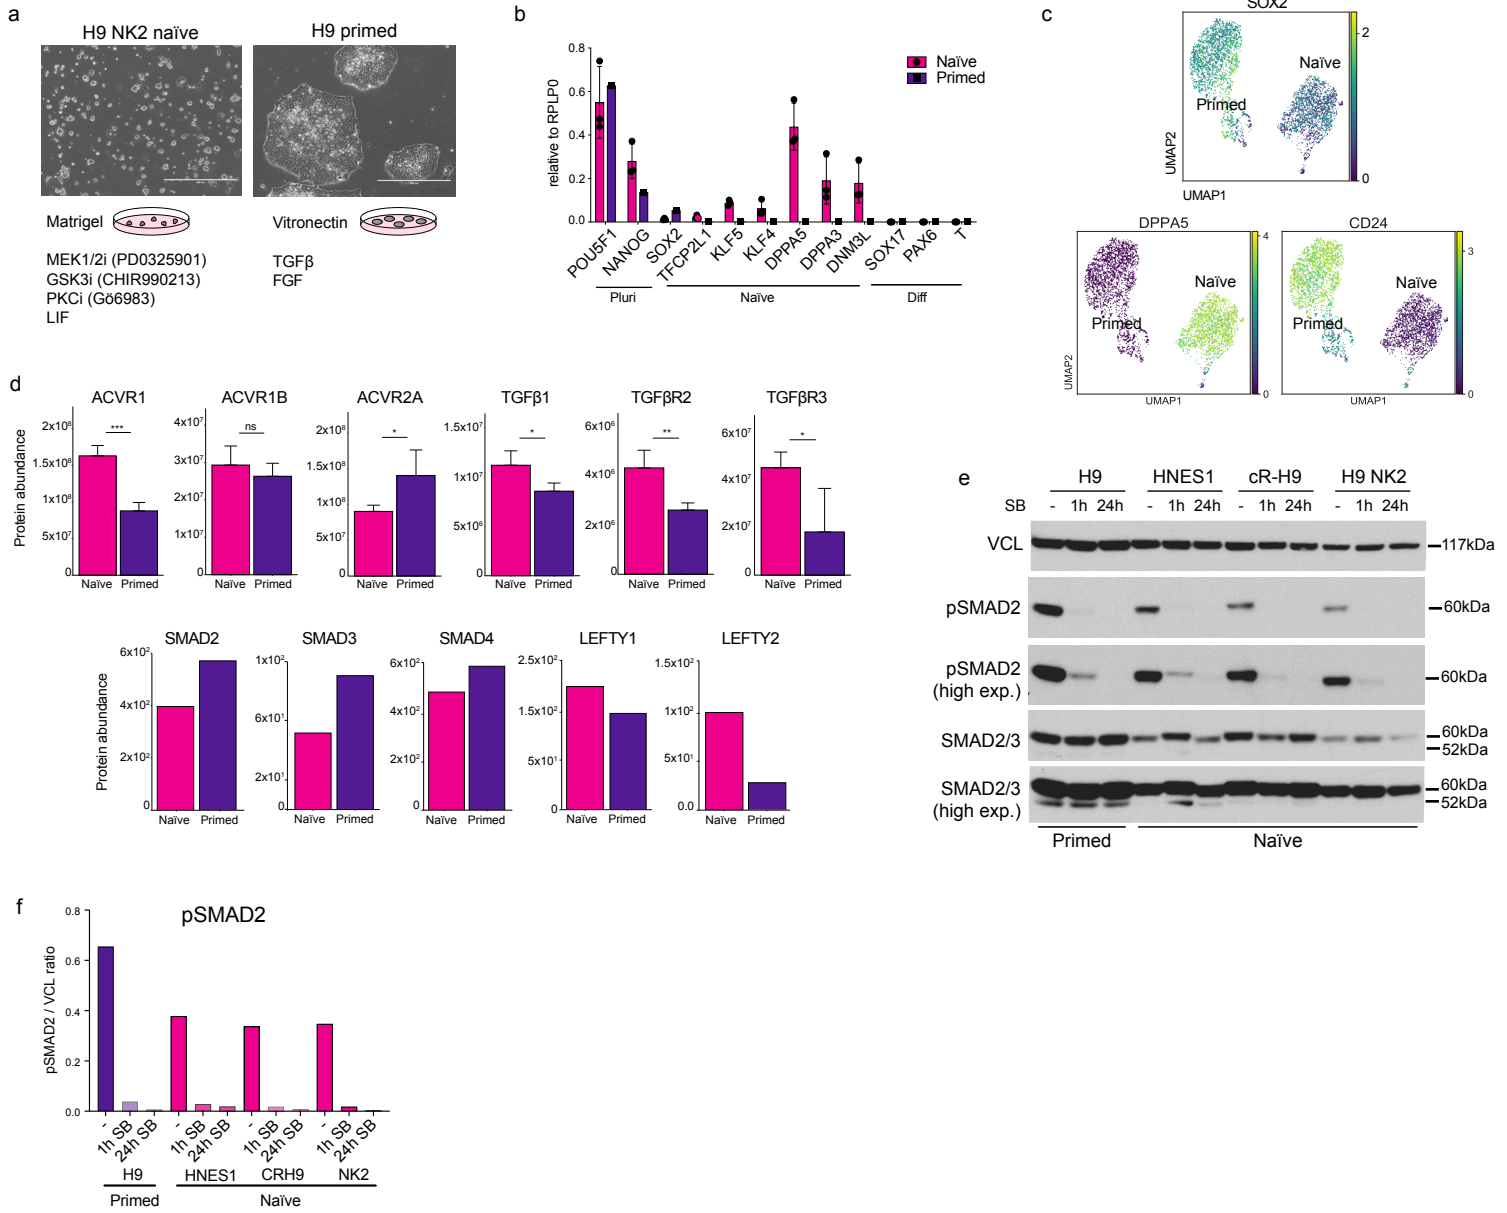

1 **Supplemental Figure 1. Validation of naïve and primed hPSCs and TGF $\beta$  signalling**  
2 **pathway activation**

- 3 a) Overview of the conditions used for culturing naïve and primed hPSCs and representative  
4 phase-contrast images.
- 5 b) RT-qPCR expression analysis of pan-pluripotency genes (Pluri), naïve markers (Naïve) and  
6 early-stage germ cell layer markers (Diff) in naïve and primed hPSCs. Data show the mean  $\pm$   
7 SD of three biological replicates, relative to the housekeeping gene *RPLP0*.
- 8 c) UMAP visualisation of naïve and primed cells reporting the relative expression of  
9 pluripotency marker *SOX2*, naïve marker *DPPA5*, and primed marker *CD24*.
- 10 d) Protein abundance levels for several TGF $\beta$  receptors (upper; (Wojdyla et al., 2020)) and  
11 transduction proteins (lower; (Di Stefano et al., 2018)) in naïve and primed hPSCs. The upper  
12 charts show the mean  $\pm$ SD of three (naïve) or four (primed) biological replicates and were  
13 compared using a LIMMA-moderated t test with Benjamini-Hochberg correction (ns,  $q > 0.05$ ,  
14  $*q < 0.05$ ,  $**q < 0.01$ ,  $***q < 0.001$ ,  $****q < 0.0001$ ). The lower charts show protein  
15 abundance of one biological replicate per cell type.
- 16 e) Expanded western blot from Figure 1h comparing TGF $\beta$  pathway activation in primed H9  
17 cells (cultured in E8 medium) and in three naïve hPSC lines cultured in t2iLGö medium:  
18 embryo-derived HNES1, chemically-reset cR-H9, and transgene-reset H9 NK2 naïve cells.  
19 Blots show SMAD2 phosphorylation signal and total SMAD2/3 in normal conditions (-), and  
20 following 1h and 24h of SB431542 supplementation to their culture media. Two separate  
21 exposures are shown. Vinculin (VCL) used as loading control.
- 22 f) Relative quantification of western blot from Figure 1h performed using the software Fiji  
23 (ImageJ) reporting the pSMAD2 / Vinculin (VCL) ratio.

## Supplemental Figure 2

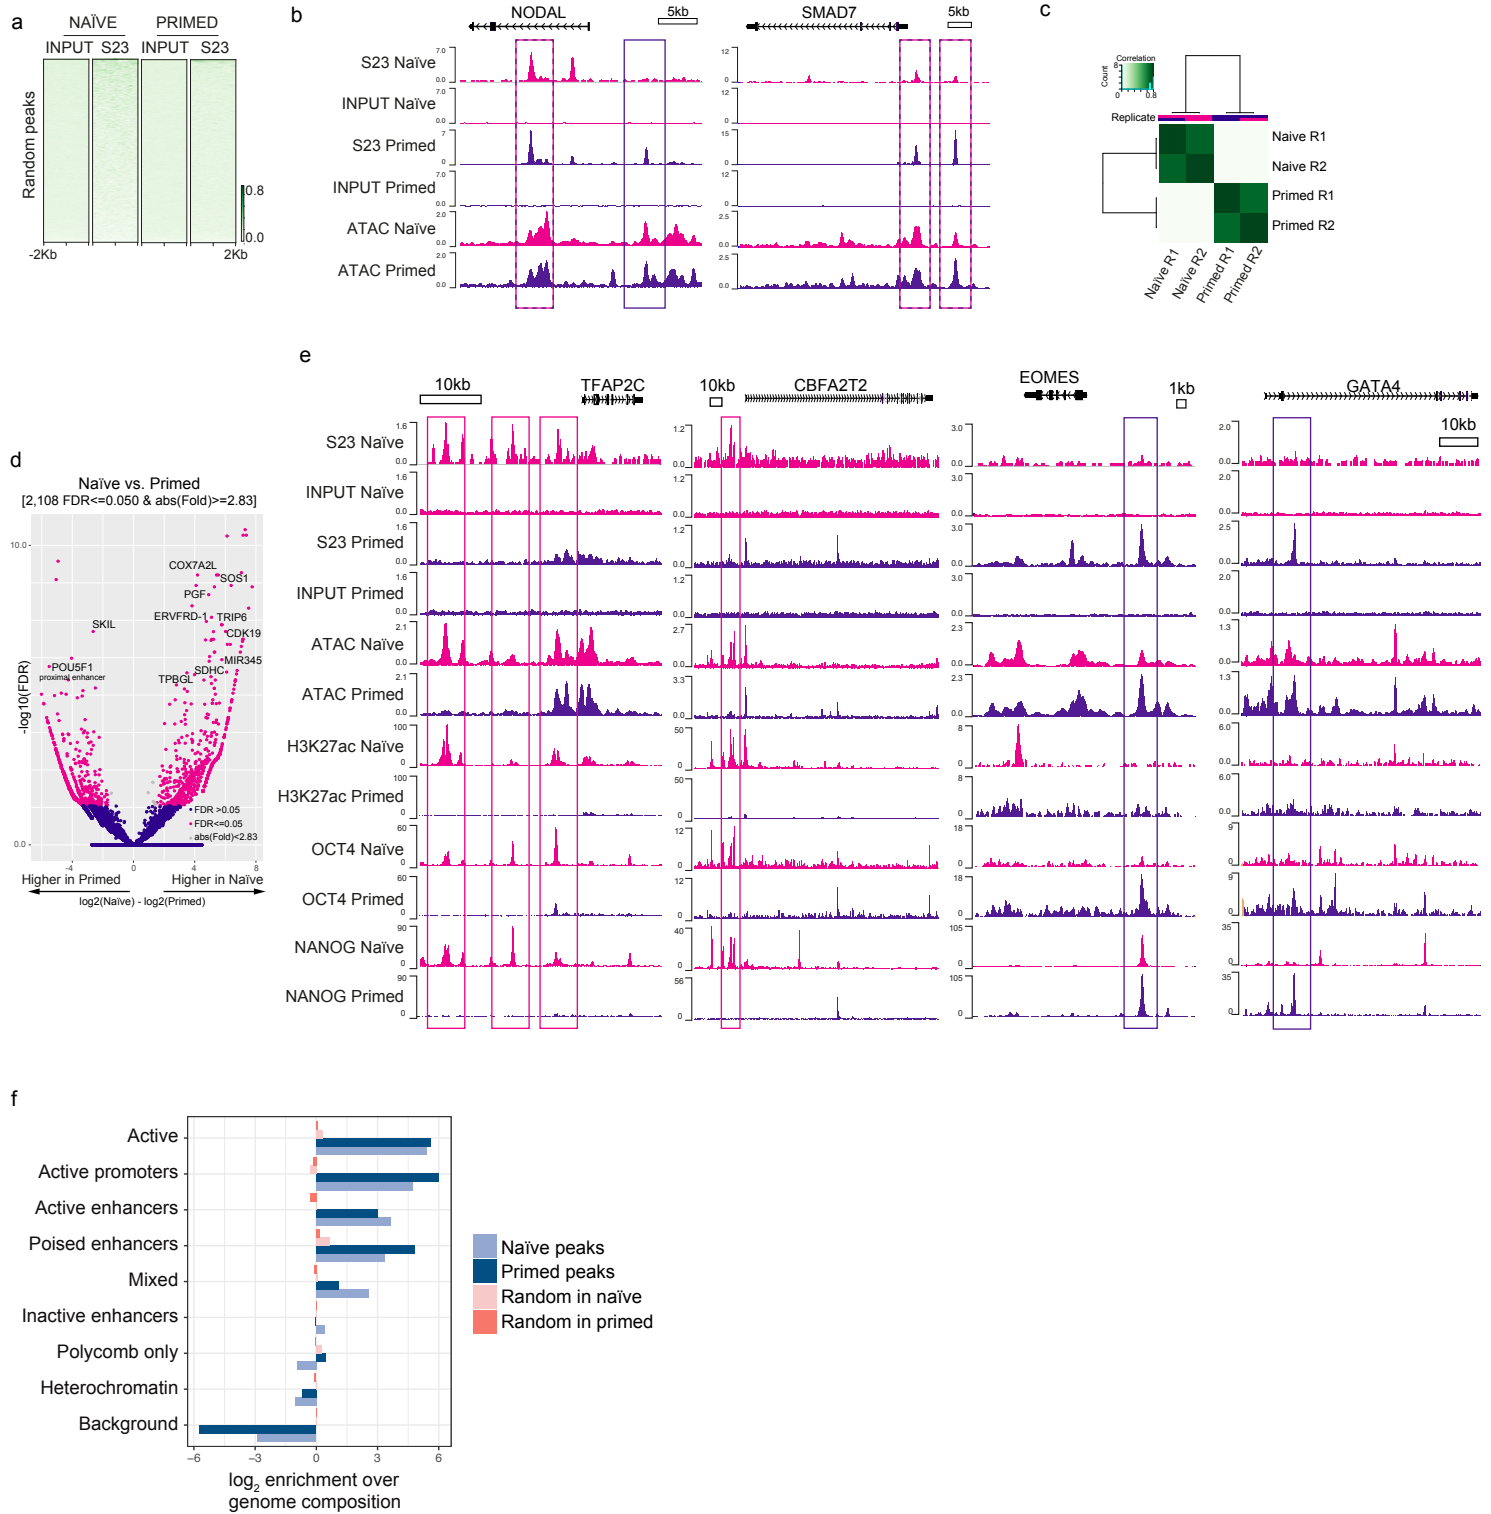

1 **Supplemental Figure 2. SMAD2/3 binds to chromatin at common and state-specific sites**

- 2 a) Heatmap displaying normalised SMAD2/3 ChIP-seq signal  $\pm 2$ kb from the centre of the  
3 peaks in a randomly-selected subset of regions, complementing Figure 2a.
- 4 b) Genome browser tracks overlapping SMAD2/3 (S23) binding sites in naïve and primed cells  
5 with chromatin accessibility (ATAC-seq) at the *NODAL* and *SMAD7* loci. Input is shown as  
6 control.
- 7 c) Correlation heatmap reporting the clustering of SMAD2/3 ChIP-seq replicates (R1 and R2)  
8 for each cell type, based on the count scores.
- 9 d) Volcano plot reporting the fold change in SMAD2/3 ChIP-seq signal at SMAD2/3 peaks  
10 between naïve and primed cells and the associated false discovery rate. Each dot represents a  
11 SMAD2/3 peak. Dots highlighted in pink are significantly differentially bound sites ( $\log_{10}$  FDR  
12  $\leq 0.05$ ;  $\log_2$  fold changes  $\geq 1.5$ ).
- 13 e) Genome browser tracks exemplify the overlap between SMAD2/3 (S23) ChIP-seq binding  
14 sites in naïve and primed cells with chromatin accessibility (ATAC-seq), histone marks for  
15 active enhancers (H3K27ac), and OCT4 and NANOG ChIP-seq signal. Input is shown as  
16 control.
- 17 f) Bar plot reporting the  $\log_2$  enrichment of SMAD2/3 peaks at ChromHMM-defined promoter  
18 and enhancer regions compared to other genomic regions. Related to Figure 2f.

### Supplemental Figure 3

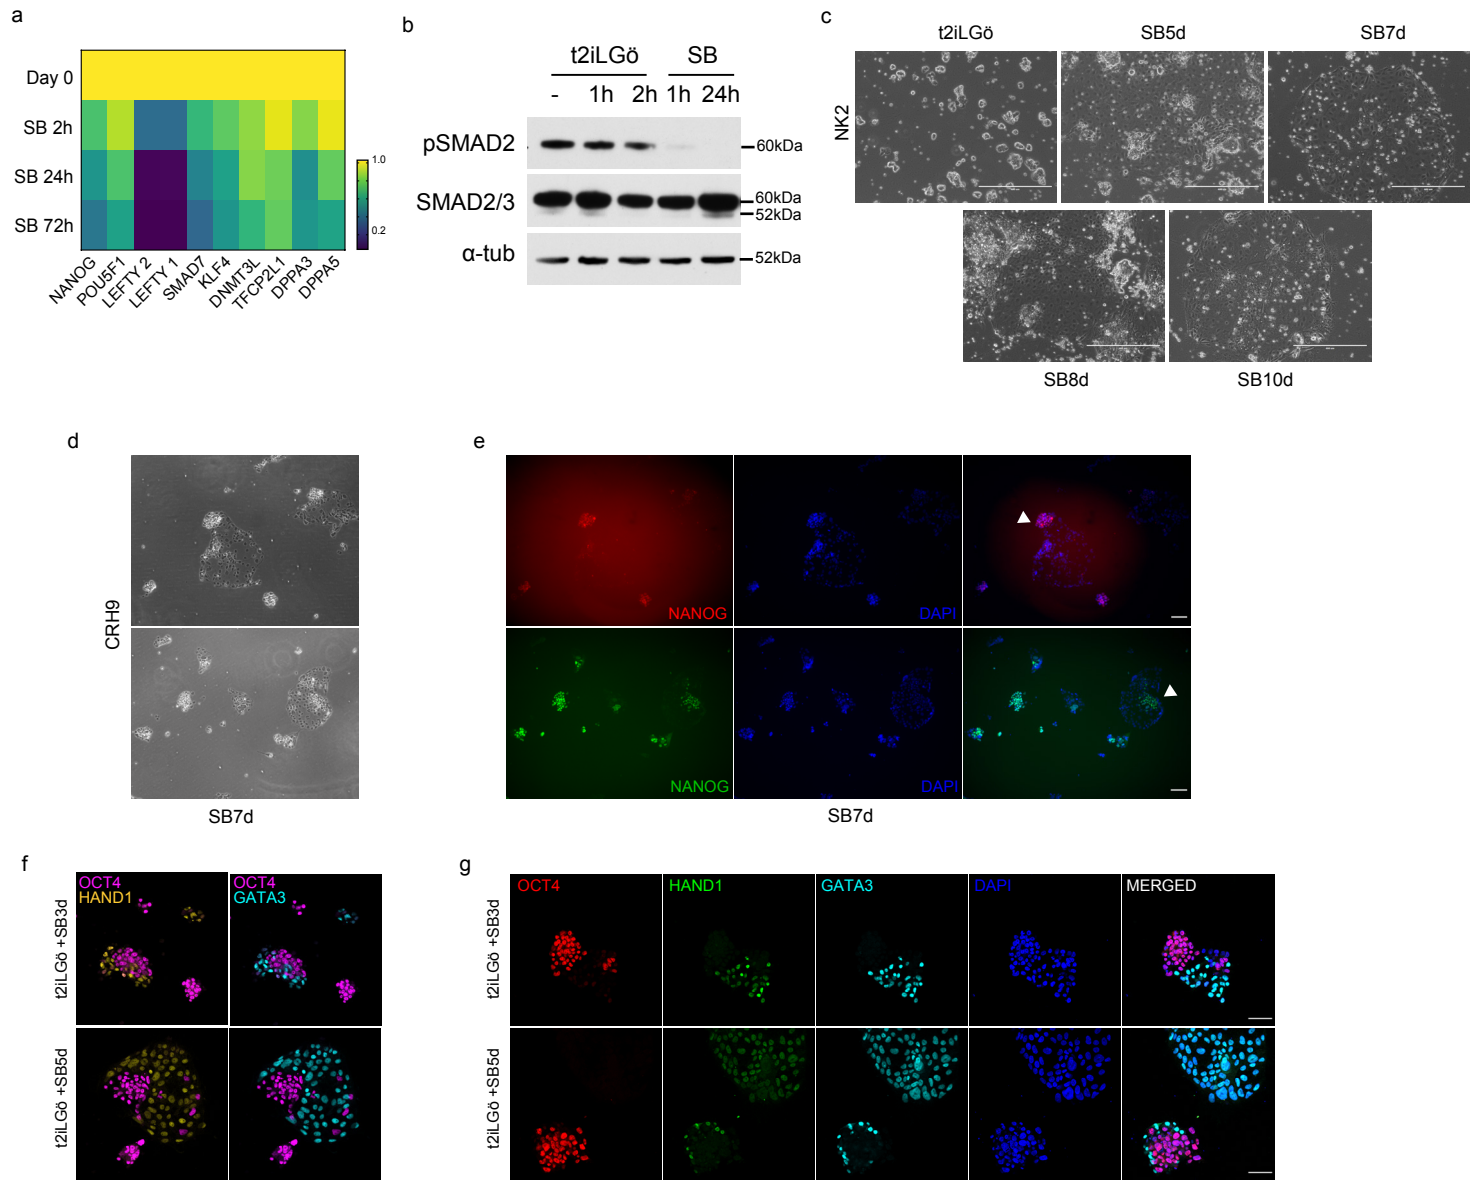



1 **Supplemental Figure 3. TGF $\beta$  signalling inhibition induces loss of pluripotency in**  
2 **different naïve hPSCs**

- 3 a) Heatmap reporting RT-qPCR expression analysis of pluripotency genes and TGF $\beta$ -  
4 associated genes in naïve cells following the addition of SB to the culture medium (t2iLGö),  
5 related to Figure 3a. Data show the mean of three biological replicates as fold changes  
6 compared to day 0.
- 7 b) Western blot showing TGF $\beta$  pathway activation in H9 NK2 naïve cells through the  
8 phosphorylation of SMAD2 (pSMAD2) and also total SMAD2/3 in normal conditions (-), after  
9 1h and 2h of fresh media change (t2iLGö), and following 1h and 24h of SB treatment  
10 (t2iLGö+SB). Alpha-tubulin ( $\alpha$ -tub) used as loading control.
- 11 c) Phase-contrast images of H9 NK2 naïve cells at day 0 (t2iLGö) and following 5, 7, 8 and 10  
12 days of SB supplementation to the t2iLGö medium. Scale bars: 400 $\mu$ m.
- 13 d) Phase-contrast images of chemically-reset cR-H9 naïve cells after 7 days of SB treatment.
- 14 e) Immunofluorescence microscopy of H9 NK2 naïve hPSCs for NANOG (red/green), and  
15 DAPI (blue), after 7 days of SB treatment in chemically-reset cR-H9 naïve cells, matching the  
16 phase-contrast images in Supplementary Figure 3d. White arrowheads indicate colonies  
17 displaying heterogeneous NANOG expression. Scale bars: 50  $\mu$ m.
- 18 f) Immunofluorescence microscopy complementing Figure 3g showing (left) OCT4 (red) and  
19 HAND1 (green) overlap, or (right) OCT4 (red) and GATA3 (cyan) overlap after 3 and 5 days  
20 of SB treatment. Scale bars: 50  $\mu$ m.
- 21 g) Immunofluorescence microscopy of H9 NK2 naïve hPSCs for OCT4 (red), HAND1 (green),  
22 GATA3 (cyan) and DAPI (blue) after 3 (upper) and 5 (lower) days of SB treatment. Scale bars:  
23 50  $\mu$ m.

## Supplemental Figure 4

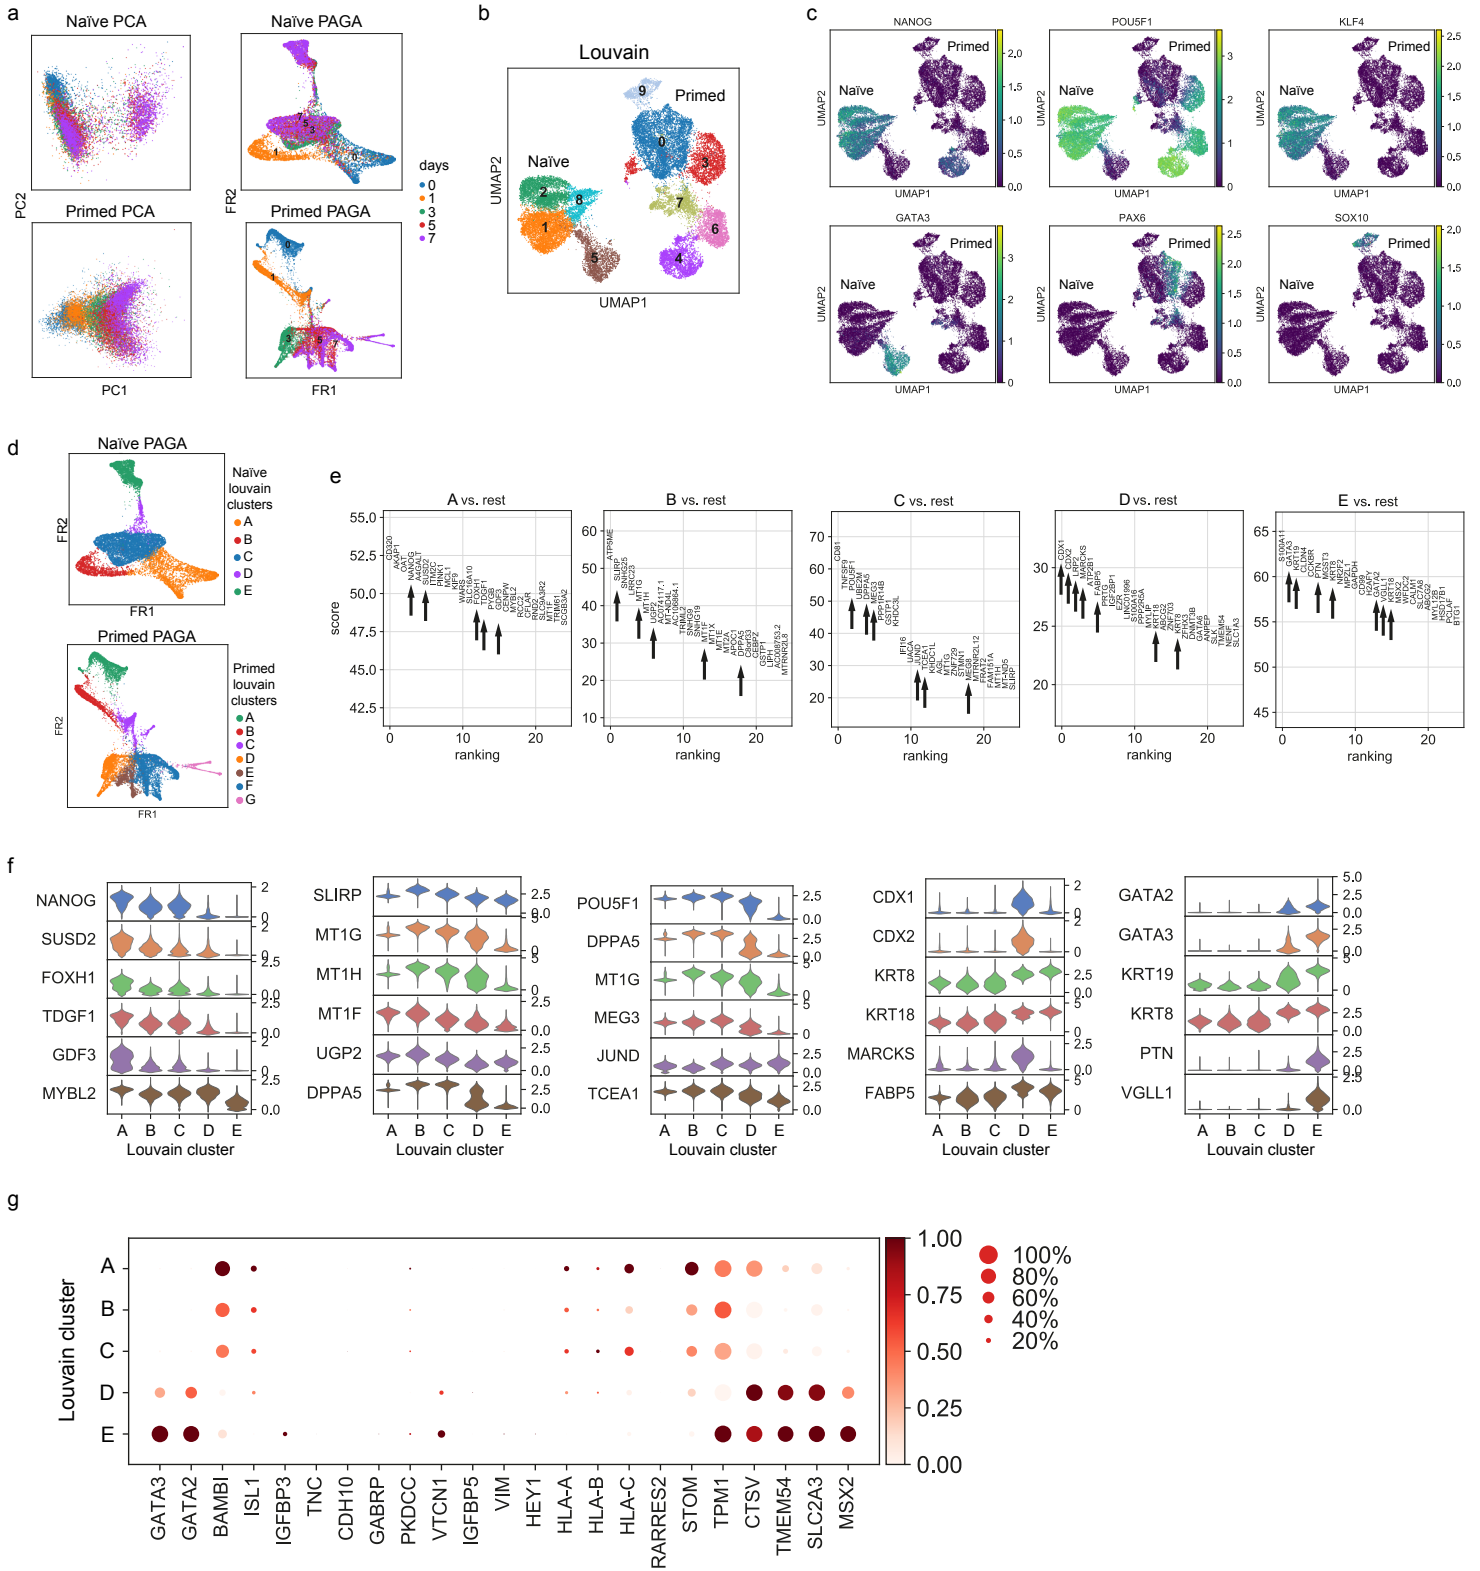

1 **Supplemental Figure 4. Single-cell transcriptional analysis reveals different trajectories**  
2 **between naïve and primed hPSCs following TGFβ inhibition**

- 3 a) PCA and partition-based graph abstraction (PAGA) connectivity visualisation of the 10X  
4 RNA-seq data in naïve and primed hPSCs during the SB time-course, separated by days of  
5 treatment.
- 6 b) UMAP visualisation of the combined naïve and primed cell 10X dataset during the SB time-  
7 course experiment, separated by Louvain clustering.
- 8 c) UMAP visualisation of the combined naïve and primed cell 10X dataset reporting the  
9 relative expression of pluripotency markers *NANOG*, *POU5F1*, *KLF4*, trophoblast marker  
10 *GATA3*, and neuroectoderm markers *PAX6*, *SOX10*.
- 11 d) PAGA connectivity visualisation of naïve and primed cells during the SB time-course  
12 experiment, separated by Louvain clustering.
- 13 e) Summarised results showing the top 25 differentially expressed genes between Louvain  
14 clusters, identified by applying a Wilcoxon-Rank-Sum test. Black arrows highlight informative  
15 genes relative to each cluster.
- 16 f) Violin plots reporting the expression of a subset of genes identified in Figure 4g and  
17 Supplementary Figure 4e.
- 18 g) Dot plot of expression values in naïve cells during the SB time-course experiment, separated  
19 by the five Louvain clusters. The genes shown represent a subset of amnion marker genes  
20 reported in (Guo et al., 2021; Io et al., 2021; Zhao et al., 2021). Note that some genes are also  
21 expressed in trophoblast cells. Each dot represents two values: mean expression within each  
22 category (visualised by colour) and fraction of cells expressing the gene (visualised by the size  
23 of the dot).

## Supplemental Figure 5

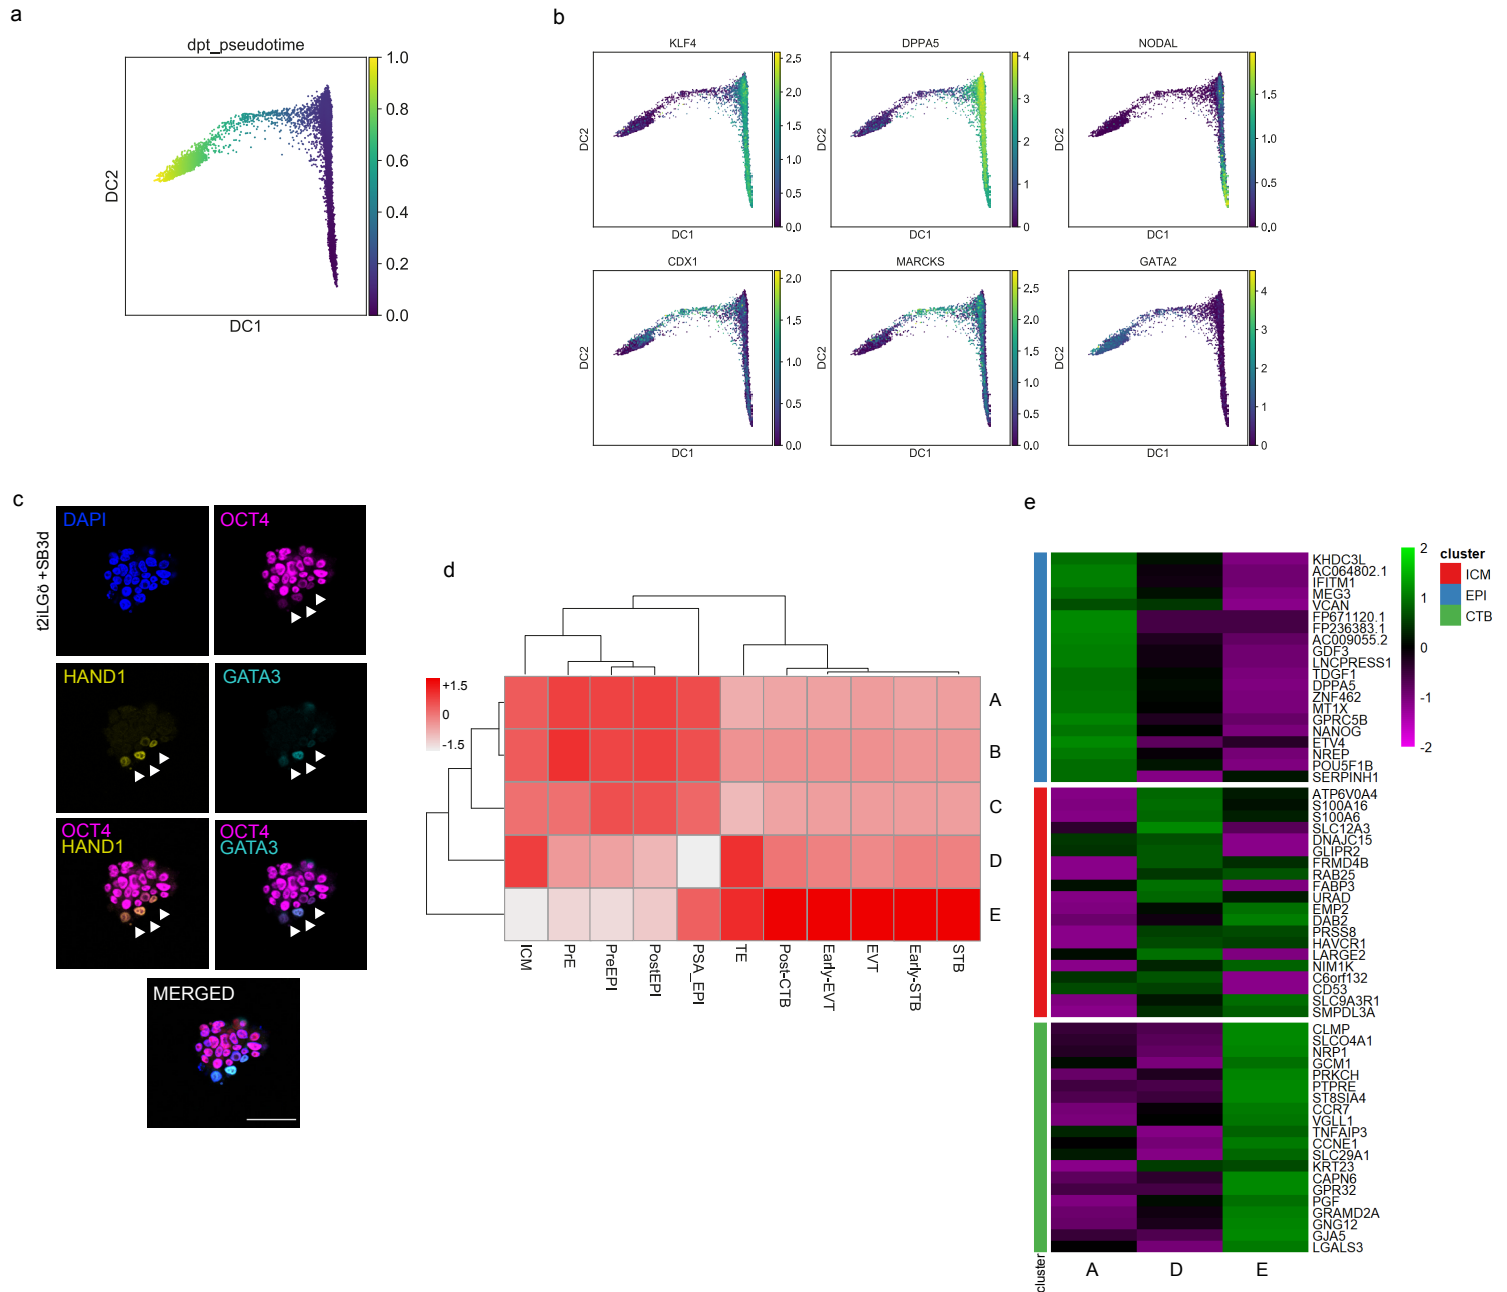

1 **Supplemental Figure 5. Pseudotime trajectories of TGF $\beta$ -inhibited naïve hPSCs**  
2 **recapitulates early trophoderm specification in human embryos**

3 a) Diffusion maps of naïve hPSC 10X scRNA-seq data during the SB time-course, reporting  
4 diffusion pseudotime scores.

5 b) Diffusion map visualisation of naïve cells during the SB time-course reporting the relative  
6 expression of additional pluripotency markers *KLF4* and *DPPA5*, TGF $\beta$  effector *NODAL*, and  
7 trophoblast markers *CDX1*, *MARCKS* and *GATA2*.

8 c) Immunofluorescence microscopy for OCT4 (red), HAND1 (green), GATA3 (cyan) and  
9 DAPI (blue) in H9 NK2 naïve cells following 3 days of SB supplementation to t2iLGö medium.  
10 White arrowheads indicate cells that co-express low levels of OCT4 and HAND1 or GATA3.  
11 Scale bars: 50  $\mu$ m.

12 d) Correlation heatmap between the pseudobulked datasets from all Louvain clusters  
13 (A/B/C/D/E) and the identified cell lineages from the cultured human pre-gastrulation embryos  
14 (Xiang et al., 2020). CTB: Cytotrophoblast; ETV: Extravillous trophoblast; STB:  
15 Syncytiotrophoblast; EPI: Epiblast; ICM: Inner Cell Mass; PrE: Primitive Endoderm, TE:  
16 Trophoderm.

17 e) Heatmap reporting the expression in the Louvain clusters A, D, and E of the top 20  
18 differentially expressed genes between EPI, ICM and CTB cell lineages (based on data  
19 published by (Xiang et al., 2020).

## 1 References

- 2 Alici-Garipcan A, Özçimen B, Süder I, Ülker V, Önder TT, Özören N. 2020. NLRP7 plays a  
3 functional role in regulating BMP4 signaling during differentiation of patient-derived  
4 trophoblasts. *Cell Death Dis* **11**:658.
- 5 Azuara V, Perry P, Sauer S, Spivakov M, Jørgensen HF, John RM, Gouti M, Casanova M, Warnes G,  
6 Merckenschlager M, Fisher AG. 2006. Chromatin signatures of pluripotent cell lines. *Nat Cell*  
7 *Biol* **8**:532–538.
- 8 Barakat TS, Halbritter F, Zhang M, Rendeiro AF, Perenthaler E, Bock C, Chambers I. 2018.  
9 Functional Dissection of the Enhancer Repertoire in Human Embryonic Stem Cells. *Cell Stem*  
10 *Cell* **23**:276–288.e8.
- 11 Battle SL, Doni Jayavelu N, Azad RN, Hesson J, Ahmed FN, Overbey EG, Zoller JA, Mathieu J,  
12 Ruohola-Baker H, Ware CB, Hawkins RD. 2019. Enhancer Chromatin and 3D Genome  
13 Architecture Changes from Naive to Primed Human Embryonic Stem Cell States. *Stem Cell*  
14 *Reports* **12**:1129–1144.
- 15 Bayerl J, Ayyash M, Shani T, Manor YS, Gafni O, Massarwa R, Kalma Y, Aguilera-Castrejon A,  
16 Zerbib M, Amir H, Sheban D, Geula S, Mor N, Weinberger L, Naveh Tassa S, Krupalnik V,  
17 Oldak B, Livnat N, Tarazi S, Tawil S, Wildschutz E, Ashouokhi S, Lasman L, Rotter V, Hanna  
18 S, Ben-Yosef D, Novershtern N, Viukov S, Hanna JH. 2021. Principles of signaling pathway  
19 modulation for enhancing human naive pluripotency induction. *Cell Stem Cell*.  
20 doi:10.1016/j.stem.2021.04.001
- 21 Bernstein BE, Mikkelsen TS, Xie X, Kamal M, Huebert DJ, Cuff J, Fry B, Meissner A, Wernig M,  
22 Plath K, Jaenisch R, Wagschal A, Feil R, Schreiber SL, Lander ES. 2006. A bivalent chromatin  
23 structure marks key developmental genes in embryonic stem cells. *Cell* **125**:315–326.
- 24 Bertero A, Pawlowski M, Ortmann D, Snijders K, Yiangou L, de Brito MC, Brown S, Bernard WG,  
25 Cooper JD, Giacomelli E, Gambardella L, Hannan NRF, Iyer D, Sampaziotis F, Serrano F,  
26 Zonneveld MCF, Sinha S, Kotter M, Vallier L. 2016. Optimized inducible shRNA and  
27 CRISPR/Cas9 platforms for in vitro studies of human development using hPSCs. *Development*.  
28 doi:10.1242/dev.138081
- 29 Bertero A, Yiangou L, Brown S, Ortmann D, Pawlowski M, Vallier L. 2018. Conditional  
30 Manipulation of Gene Function in Human Cells with Optimized Inducible shRNA. *Curr Protoc*  
31 *Stem Cell Biol* **44**:5C.4.1–5C.4.48.
- 32 Blakeley P, Fogarty N, Del Valle I, Wamaitha S, Hu TX, Elder K, Snell P, Christie L, Robson P,  
33 Niakan K. 2017. Defining the three cell lineages of the human blastocyst by single-cell RNA-  
34 seq. *Mechanisms of Development*. doi:10.1016/j.mod.2017.04.015
- 35 Bredenkamp N, Stirparo GG, Nichols J, Smith A, Guo G. 2019a. The Cell-Surface Marker Sushi  
36 Containing Domain 2 Facilitates Establishment of Human Naive Pluripotent Stem Cells. *Stem*

- 1 *Cell Reports* **12**:1212–1222.
- 2 Breidenkamp N, Yang J, Clarke J, Stirparo GG, von Meyenn F, Dietmann S, Baker D, Drummond R,  
3 Ren Y, Li D, Wu C, Rostovskaya M, Eminli-Meissner S, Smith A, Guo G. 2019b. Wnt  
4 Inhibition Facilitates RNA-Mediated Reprogramming of Human Somatic Cells to Naive  
5 Pluripotency. *Stem Cell Reports* **13**:1083–1098.
- 6 Brennan J, Lu CC, Norris DP, Rodriguez TA, Beddington RS, Robertson EJ. 2001. Nodal signalling  
7 in the epiblast patterns the early mouse embryo. *Nature* **411**:965–969.
- 8 Brons IGM, Smithers LE, Trotter MWB, Rugg-Gunn P, Sun B, Chuva de Sousa Lopes SM, Howlett  
9 SK, Clarkson A, Ahrlund-Richter L, Pedersen RA, Vallier L. 2007. Derivation of pluripotent  
10 epiblast stem cells from mammalian embryos. *Nature* **448**:191–195.
- 11 Brown S, Teo A, Pauklin S, Hannan N, Cho CH-H, Lim B, Vardy L, Dunn NR, Trotter M, Pedersen  
12 R, Vallier L. 2011. Activin/Nodal signaling controls divergent transcriptional networks in human  
13 embryonic stem cells and in endoderm progenitors. *Stem Cells* **29**:1176–1185.
- 14 Cambuli F, Murray A, Dean W, Dudzinska D, Krueger F, Andrews S, Senner CE, Cook SJ,  
15 Hemberger M. 2014. Epigenetic memory of the first cell fate decision prevents complete ES cell  
16 reprogramming into trophoblast. *Nat Commun* **5**:5538.
- 17 Camus A, Perea-Gomez A, Moreau A, Collignon J. 2006. Absence of Nodal signaling promotes  
18 precocious neural differentiation in the mouse embryo. *Dev Biol* **295**:743–755.
- 19 Castel G, Meistermann D, Bretin B, Firmin J, Blin J, Loubersac S, Bruneau A, Chevolleau S, Kilens  
20 S, Chariou C, Gaignerie A, Francheteau Q, Kagawa H, Charpentier E, Flippe L, François-  
21 Champion V, Haider S, Dietrich B, Knöfler M, Arima T, Bourdon J, Rivron N, Masson D,  
22 Fournier T, Okae H, Fréour T, David L. 2020. Induction of Human Trophoblast Stem Cells from  
23 Somatic Cells and Pluripotent Stem Cells. *Cell Rep* **33**:108419.
- 24 Chan Y-S, Göke J, Ng J-H, Lu X, Gonzales KAU, Tan C-P, Tng W-Q, Hong Z-Z, Lim Y-S, Ng H-H.  
25 2013. Induction of a human pluripotent state with distinct regulatory circuitry that resembles  
26 preimplantation epiblast. *Cell Stem Cell* **13**:663–675.
- 27 Chovanec P, Collier AJ, Krueger C, Várnai C, Semprich CI, Schoenfelder S, Corcoran AE, Rugg-  
28 Gunn PJ. 2021. Widespread reorganisation of pluripotent factor binding and gene regulatory  
29 interactions between human pluripotent states. *Nat Commun* **12**:2098.
- 30 Cinkornpumin JK, Kwon SY, Guo Y, Hossain I, Sirois J, Russett CS, Tseng H-W, Okae H, Arima T,  
31 Duchaine TF, Liu W, Pastor WA. 2020. Naive Human Embryonic Stem Cells Can Give Rise to  
32 Cells with a Trophoblast-like Transcriptome and Methylome. *Stem Cell Reports* **15**:198–213.
- 33 Collier AJ, Panula SP, Schell JP, Chovanec P, Plaza Reyes A, Petropoulos S, Corcoran AE, Walker  
34 R, Douagi I, Lanner F, Rugg-Gunn PJ. 2017. Comprehensive Cell Surface Protein Profiling  
35 Identifies Specific Markers of Human Naive and Primed Pluripotent States. *Cell Stem Cell*  
36 **20**:874–890.
- 37 D'Amour KA, Agulnick AD, Eliazar S, Kelly OG, Kroon E, Baetge EE. 2005. Efficient



- 1 differentiation of human embryonic stem cells to definitive endoderm. *Nat Biotechnol* **23**:1534–  
2 1541.
- 3 Davidson KC, Mason EA, Pera MF. 2015. The pluripotent state in mouse and human. *Development*  
4 **142**:3090–3099.
- 5 Dawlaty MM, Ganz K, Powell BE, Hu Y-C, Markoulaki S, Cheng AW, Gao Q, Kim J, Choi S-W,  
6 Page DC, Jaenisch R. 2011. Tet1 is dispensable for maintaining pluripotency and its loss is  
7 compatible with embryonic and postnatal development. *Cell Stem Cell* **9**:166–175.
- 8 Di Stefano B, Ueda M, Sabri S, Brumbaugh J, Huebner AJ, Sahakyan A, Clement K, Clowers KJ,  
9 Erickson AR, Shioda K, Gygi SP, Gu H, Shioda T, Meissner A, Takashima Y, Plath K,  
10 Hochedlinger K. 2018. Reduced MEK inhibition preserves genomic stability in naive human  
11 embryonic stem cells. *Nat Methods* **15**:732–740.
- 12 Dong C, Beltcheva M, Gontarz P, Zhang B, Popli P, Fischer LA, Khan SA, Park K-M, Yoon E-J,  
13 Xing X, Kommagani R, Wang T, Solnica-Krezel L, Theunissen TW. 2020. Derivation of  
14 trophoblast stem cells from naïve human pluripotent stem cells. *Elife* **9**. doi:10.7554/eLife.52504
- 15 Dong C, Fischer LA, Theunissen TW. 2019. Recent insights into the naïve state of human  
16 pluripotency and its applications. *Exp Cell Res* **385**:111645.
- 17 Gafni O, Weinberger L, Mansour AA, Manor YS, Chomsky E, Ben-Yosef D, Kalma Y, Viukov S,  
18 Maza I, Zviran A, Rais Y, Shipony Z, Mukamel Z, Krupalnik V, Zerbib M, Geula S, Caspi I,  
19 Schneir D, Shwartz T, Gilad S, Amann-Zalcenstein D, Benjamin S, Amit I, Tanay A, Massarwa  
20 R, Novershtern N, Hanna JH. 2013. Derivation of novel human ground state naive pluripotent  
21 stem cells. *Nature* **504**:282–286.
- 22 Gifford CA, Ziller MJ, Gu H, Trapnell C, Donaghey J, Tsankov A, Shalek AK, Kelley DR, Shishkin  
23 AA, Issner R, Zhang X, Coyne M, Fostel JL, Holmes L, Meldrim J, Guttman M, Epstein C, Park  
24 H, Kohlbacher O, Rinn J, Gnirke A, Lander ES, Bernstein BE, Meissner A. 2013.  
25 Transcriptional and epigenetic dynamics during specification of human embryonic stem cells.  
26 *Cell* **153**:1149–1163.
- 27 Guo G, Stirparo GG, Strawbridge SE, Spindlow D, Yang J, Clarke J, Dattani A, Yanagida A, Li MA,  
28 Myers S, Özel BN, Nichols J, Smith A. 2021. Human naive epiblast cells possess unrestricted  
29 lineage potential. *Cell Stem Cell* **28**:1040–1056.
- 30 Guo G, von Meyenn F, Rostovskaya M, Clarke J, Dietmann S, Baker D, Sahakyan A, Myers S,  
31 Bertone P, Reik W, Plath K, Smith A. 2017. Epigenetic resetting of human pluripotency.  
32 *Development* **144**:2748–2763.
- 33 Guo G, von Meyenn F, Santos F, Chen Y, Reik W, Bertone P, Smith A, Nichols J. 2016. Naive  
34 Pluripotent Stem Cells Derived Directly from Isolated Cells of the Human Inner Cell Mass. *Stem*  
35 *Cell Reports* **6**:437–446.
- 36 Heintzman ND, Hon GC, Hawkins RD, Kheradpour P, Stark A, Harp LF, Ye Z, Lee LK, Stuart RK,  
37 Ching CW, Ching KA, Antosiewicz-Bourget JE, Liu H, Zhang X, Green RD, Lobanenkov VV,

- 1 Stewart R, Thomson JA, Crawford GE, Kellis M, Ren B. 2009. Histone modifications at human  
2 enhancers reflect global cell-type-specific gene expression. *Nature* **459**:108–112.
- 3 Inman GJ, Nicolás FJ, Callahan JF, Harling JD. 2002. SB-431542 is a potent and specific inhibitor of  
4 transforming growth factor- $\beta$  superfamily type I activin receptor-like kinase (ALK) receptors  
5 ALK4, ALK5, and ALK7. *Molecular Pharmacology* **62**:65–74.
- 6 Io S, Kabata M, Iemura Y, Semi K, Morone N, Minagawa A, Wang B, Okamoto I, Nakamura T,  
7 Kojima Y, Iwatani C, Tsuchiya H, Kaswandy B, Kondoh E, Kaneko S, Woltjen K, Saitou M,  
8 Yamamoto T, Mandai M, Takashima Y. 2021. Capturing human trophoblast development with  
9 naive pluripotent stem cells in vitro. *Cell Stem Cell* **28**:1023–1039.
- 10 James D, Levine AJ, Besser D, Hemmati-Brivanlou A. 2005. TGF $\beta$ /activin/nodal signaling is  
11 necessary for the maintenance of pluripotency in human embryonic stem cells. *Development*  
12 **132**:1273–1282.
- 13 Ji X, Dadon DB, Powell BE, Fan ZP, Borges-Rivera D, Shachar S, Weintraub AS, Hnisz D, Pegoraro  
14 G, Lee TI, Misteli T, Jaenisch R, Young RA. 2016. 3D Chromosome Regulatory Landscape of  
15 Human Pluripotent Cells. *Cell Stem Cell* **18**:262–275.
- 16 Koh KP, Yabuuchi A, Rao S, Huang Y, Cunniff K, Nardone J, Laiho A, Tahiliani M, Sommer CA,  
17 Mostoslavsky G, Lahesmaa R, Orkin SH, Rodig SJ, Daley GQ, Rao A. 2011. Tet1 and Tet2  
18 regulate 5-hydroxymethylcytosine production and cell lineage specification in mouse embryonic  
19 stem cells. *Cell Stem Cell* **8**:200–213.
- 20 Linneberg-Agerholm M, Wong YF, Romero Herrera JA, Monteiro RS, Anderson KGV, Brickman  
21 JM. 2019. Naïve human pluripotent stem cells respond to Wnt, Nodal and LIF signalling to  
22 produce expandable naïve extra-embryonic endoderm. *Development* **146**.  
23 doi:10.1242/dev.180620
- 24 Liu X, Ouyang JF, Rossello FJ, Tan JP, Davidson KC, Valdes DS, Schröder J, Sun YBY, Chen J,  
25 Knaupp AS, Sun G, Chy HS, Huang Z, Pflueger J, Firas J, Tano V, Buckberry S, Paynter JM,  
26 Larcombe MR, Poppe D, Choo XY, O'Brien CM, Pastor WA, Chen D, Leichter AL, Naeem H,  
27 Tripathi P, Das PP, Grubman A, Powell DR, Laslett AL, David L, Nilsson SK, Clark AT, Lister  
28 R, Nefzger CM, Martelotto LG, Rackham OJL, Polo JM. 2020. Reprogramming roadmap reveals  
29 route to human induced trophoblast stem cells. *Nature* **586**:101–107.
- 30 Mahadevan S, Wen S, Wan Y-W, Peng H-H, Otta S, Liu Z, Iacovino M, Mahen EM, Kyba M,  
31 Sadikovic B, Van den Veyver IB. 2014. NLRP7 affects trophoblast lineage differentiation, binds  
32 to overexpressed YY1 and alters CpG methylation. *Hum Mol Genet* **23**:706–716.
- 33 Mathieu J, Ruohola-Baker H. 2017. Metabolic remodeling during the loss and acquisition of  
34 pluripotency. *Development* **144**:541–551.
- 35 Mesnard D, Guzman-Ayala M, Constam DB. 2006. Nodal specifies embryonic visceral endoderm and  
36 sustains pluripotent cells in the epiblast before overt axial patterning. *Development* **133**:2497–  
37 2505.

- 1 Niakan KK, Eggan K. 2013. Analysis of human embryos from zygote to blastocyst reveals distinct  
2 gene expression patterns relative to the mouse. *Dev Biol* **375**:54–64.
- 3 Okae H, Toh H, Sato T, Hiura H, Takahashi S, Shirane K, Kabayama Y, Suyama M, Sasaki H, Arima  
4 T. 2018. Derivation of Human Trophoblast Stem Cells. *Cell Stem Cell* **22**:50–63.
- 5 Pastor WA, Chen D, Liu W, Kim R, Sahakyan A, Lukianchikov A, Plath K, Jacobsen SE, Clark AT.  
6 2016. Naive Human Pluripotent Cells Feature a Methylation Landscape Devoid of Blastocyst or  
7 Germline Memory. *Cell Stem Cell* **18**:323–329.
- 8 Pastor WA, Liu W, Chen D, Ho J, Kim R, Hunt TJ, Lukianchikov A, Liu X, Polo JM, Jacobsen SE,  
9 Clark AT. 2018. TFAP2C regulates transcription in human naive pluripotency by opening  
10 enhancers. *Nat Cell Biol* **20**:553–564.
- 11 Petropoulos S, Edsgård D, Reinius B, Deng Q, Panula SP, Codeluppi S, Reyes AP, Linnarsson S,  
12 Sandberg R, Lanner F. 2016. Single-Cell RNA-Seq Reveals Lineage and X Chromosome  
13 Dynamics in Human Preimplantation Embryos. *Cell* **165**:1012–1026.
- 14 Ralston A, Cox BJ, Nishioka N, Sasaki H, Chea E, Rugg-Gunn P, Guo G, Robson P, Draper JS,  
15 Rossant J. 2010. Gata3 regulates trophoblast development downstream of Tead4 and in parallel  
16 to Cdx2. *Development* **137**:395–403.
- 17 Rossant J, Tam PPL. 2017. New Insights into Early Human Development: Lessons for Stem Cell  
18 Derivation and Differentiation. *Cell Stem Cell* **20**:18–28.
- 19 Rostovskaya M, Stirparo GG, Smith A. 2019. Capacitation of human naïve pluripotent stem cells for  
20 multi-lineage differentiation. *Development* **146**. doi:10.1242/dev.172916
- 21 Sahakyan A, Kim R, Chronis C, Sabri S, Bonora G, Theunissen TW, Kuoy E, Langerman J, Clark  
22 AT, Jaenisch R, Plath K. 2017. Human Naive Pluripotent Stem Cells Model X Chromosome  
23 Dampening and X Inactivation. *Cell Stem Cell* **20**:87–101.
- 24 Smith JR, Vallier L, Lupo G, Alexander M, Harris WA, Pedersen RA. 2008. Inhibition of  
25 Activin/Nodal signaling promotes specification of human embryonic stem cells into  
26 neuroectoderm. *Dev Biol* **313**:107–117.
- 27 Soncin F, Khater M, To C, Pizzo D, Farah O, Wakeland A, Arul Nambi Rajan K, Nelson KK, Chang  
28 C-W, Moretto-Zita M, Natale DR, Laurent LC, Parast MM. 2018. Comparative analysis of  
29 mouse and human placentae across gestation reveals species-specific regulators of placental  
30 development. *Development* **145**. doi:10.1242/dev.156273
- 31 Taei A, Rasooli P, Braun T, Hassani S-N, Baharvand H. 2020. Signal regulators of human naïve  
32 pluripotency. *Exp Cell Res* **389**:111924.
- 33 Takashima Y, Guo G, Loos R, Nichols J, Ficiz G, Krueger F, Oxley D, Santos F, Clarke J, Mansfield  
34 W, Reik W, Bertone P, Smith A. 2014. Resetting transcription factor control circuitry toward  
35 ground-state pluripotency in human. *Cell* **158**:1254–1269.
- 36 Theunissen TW, Friedli M, He Y, Planet E, O’Neil RC, Markoulaki S, Pontis J, Wang H, Iouranova  
37 A, Imbeault M, Duc J, Cohen MA, Wert KJ, Castanon R, Zhang Z, Huang Y, Nery JR, Drotar J,

- 1 Lungjangwa T, Trono D, Ecker JR, Jaenisch R. 2016. Molecular Criteria for Defining the Naive  
2 Human Pluripotent State. *Cell Stem Cell* **19**:502–515.
- 3 Theunissen TW, Powell BE, Wang H, Mitalipova M, Faddah DA, Reddy J, Fan ZP, Maetzel D, Ganz  
4 K, Shi L, Lungjangwa T, Imsoonthornruksa S, Stelzer Y, Rangarajan S, D'Alessio A, Zhang J,  
5 Gao Q, Dawlaty MM, Young RA, Gray NS, Jaenisch R. 2014. Systematic Identification of  
6 Culture Conditions for Induction and Maintenance of Naive Human Pluripotency. *Cell Stem Cell*  
7 **15**:524–526.
- 8 Thomson JA, Itskovitz-Eldor J, Shapiro SS, Waknitz MA, Swiergiel JJ, Marshall VS, Jones JM. 1998.  
9 Embryonic stem cell lines derived from human blastocysts. *Science* **282**:1145–1147.
- 10 Touboul T, Hannan NRF, Corbineau S, Martinez A, Martinet C, Branchereau S, Mainot S, Strick-  
11 Marchand H, Pedersen R, Di Santo J, Weber A, Vallier L. 2010. Generation of functional  
12 hepatocytes from human embryonic stem cells under chemically defined conditions that  
13 recapitulate liver development. *Hepatology*. doi:10.1002/hep.23506
- 14 Vallier L, Alexander M, Pedersen RA. 2005. Activin/Nodal and FGF pathways cooperate to maintain  
15 pluripotency of human embryonic stem cells. *J Cell Sci* **118**:4495–4509.
- 16 Vallier L, Mendjan S, Brown S, Chng Z, Teo A, Smithers LE, Trotter MWB, Cho CH-H, Martinez A,  
17 Rugg-Gunn P, Brons G, Pedersen RA. 2009. Activin/Nodal signalling maintains pluripotency by  
18 controlling Nanog expression. *Development* **136**:1339–1349.
- 19 Vallot C, Patrat C, Collier AJ, Huret C, Casanova M, Liyakat Ali TM, Tosolini M, Frydman N, Heard  
20 E, Rugg-Gunn PJ, Rougeulle C. 2017. XACT Noncoding RNA Competes with XIST in the  
21 Control of X Chromosome Activity during Human Early Development. *Cell Stem Cell* **20**:102–  
22 111.
- 23 Varlet I, Collignon J, Robertson EJ. 1997. nodal expression in the primitive endoderm is required for  
24 specification of the anterior axis during mouse gastrulation. *Development* **124**:1033–1044.
- 25 Weinberger L, Ayyash M, Novershtern N, Hanna JH. 2016. Dynamic stem cell states: naive to primed  
26 pluripotency in rodents and humans. *Nat Rev Mol Cell Biol* **17**:155–169.
- 27 Wojdyla K, Collier AJ, Fabian C, Nisi PS, Biggins L, Oxley D, Rugg-Gunn PJ. 2020. Cell-Surface  
28 Proteomics Identifies Differences in Signaling and Adhesion Protein Expression between Naive  
29 and Primed Human Pluripotent Stem Cells. *Stem Cell Reports* **14**:972–988.
- 30 Xiang L, Yin Y, Zheng Y, Ma Y, Li Y, Zhao Z, Guo J, Ai Z, Niu Y, Duan K, He J, Ren S, Wu D, Bai  
31 Y, Shang Z, Dai X, Ji W, Li T. 2020. A developmental landscape of 3D-cultured human pre-  
32 gastrulation embryos. *Nature* **577**:537–542.
- 33 Xu R-H, Sampsel-Barron TL, Gu F, Root S, Peck RM, Pan G, Yu J, Antosiewicz-Bourget J, Tian S,  
34 Stewart R, Thomson JA. 2008. NANOG Is a Direct Target of TGF $\beta$ /Activin-Mediated SMAD  
35 Signaling in Human ESCs. *Cell Stem Cell* **3**:196–206.
- 36 Zhao C, Reyes AP, Schell JP, Weltner J, Ortega N. 2021. Reprogrammed iBlastoids contain amnion-  
37 like cells but not trophectoderm. *bioRxiv*. doi:10.1101/2021.05.07.442980
